1 **Lgr5+ stem/progenitor cells reside at the apex of the embryonic hepatoblast pool**

2  
3 Nicole Prior<sup>1\*</sup>, Christopher J. Hindley<sup>1,2\*</sup>, Fabian Rost<sup>3</sup>, Elena Meléndez Esteban<sup>1</sup>, Winnie W.  
4 Y. Lau<sup>4</sup>, Berthold Göttgens<sup>4</sup>, Steffen Rulands<sup>1,2,3</sup>, Benjamin D. Simons<sup>1,2,5</sup> &  
5 Meritxell Huch<sup>1,5,6</sup>

6  
7 (1) The Wellcome Trust/ Cancer Research UK Gurdon Institute, University of Cambridge, Tennis  
8 Court Road, Cambridge, CB2 1QN, UK

9 (2) The Cavendish Laboratory, Department of Physics, University of Cambridge, JJ Thompson Ave,  
10 Cambridge, CB3 0HE, UK

11 (3) Max Planck Institute for the Physics of Complex Systems, Nöthnitzer Str. 38, 01187 Dresden,  
12 Germany

13 (4) Department of Haematology and Wellcome and MRC Cambridge Stem Cell Institute, University  
14 of Cambridge, Cambridge, UK

15 (5) Wellcome Trust - Medical Research Council Cambridge Stem Cell Institute, University of  
16 Cambridge, Tennis Court Rd, Cambridge, CB2 1QR, UK

17 (6) Department of Physiology, Development and Neuroscience, University of Cambridge, Cambridge,  
18 CB2 3DY, UK

19  
20 Corresponding author: Meritxell Huch (m.huch@gurdon.cam.ac.uk)

21  
22 \* These authors contributed equally

23  
24  
25 Running Title: Lgr5 as a marker of hepatoblasts

26  
27 Keywords: Hepatoblast, Lgr5, Organoid, Bi-potent, Liver stem/progenitor cells, Liver  
28 development

30 **Summary Statement:**

31 *Lgr5* positive bi-potential hepatoblasts contribute to liver development and reside at the apex  
32 of an embryonic liver progenitor pool.

33

34

35

36 **Abstract:**

37 During mouse embryogenesis, progenitors within the liver known as hepatoblasts give rise to  
38 adult hepatocyte and cholangiocyte cells. Hepatoblasts, which are specified at E8.5-E9.0,  
39 have been regarded as a homogeneous population of progenitors, which initiate  
40 differentiation into hepatocytes and cholangiocytes from E13.5 onwards. Recently, sub-  
41 populations of transcriptionally different hepatoblasts have been identified as already present  
42 at E11.5 by single cell RNAseq (scRNAseq) analysis. However, whether these transcriptional  
43 differences result from functionally heterogeneous hepatoblast populations is unknown. Here  
44 we show that the hepatoblast pool is not only transcriptionally but also functionally  
45 heterogeneous and that a sub-population of E9.5-E10.0 hepatoblasts exhibits a previously  
46 unidentified early commitment to cholangiocyte fate. Importantly, we also identify a sub-  
47 population of *bona-fide* E9.5 hepatoblasts which express the adult stem cell marker *Lgr5* and  
48 contribute to liver development by generating both hepatocyte and cholangiocyte progeny  
49 that persist for the life-span of the mouse. Using a combination of lineage tracing and  
50 scRNAseq, we show that *Lgr5* marks E9.5-E10.0 bi-potent liver progenitors residing at the  
51 apex of a hierarchy of the hepatoblast population. Notably, isolated *Lgr5*<sup>+</sup> hepatoblasts can  
52 be clonally expanded *in vitro* into embryonic liver organoids, which can commit to  
53 hepatocyte or cholangiocyte fates dependent upon the culture conditions. Our study  
54 represents the first functional demonstration of heterogeneity within E9.5 hepatoblasts and  
55 identifies *Lgr5* as a marker for a sub-population of truly bi-potent liver progenitors.

## 56 **Introduction**

57 The liver is predominantly composed of hepatocytes and cholangiocytes (also known as  
58 ductal cells or biliary epithelial cells (BECs)). These epithelial cells work in conjunction with  
59 the liver stromal, endothelial and mesenchymal cells to perform essential metabolic, exocrine  
60 and endocrine functions (Zorn, 2008). In addition to performing crucial metabolic and  
61 synthetic functions, epithelial cells have a tremendous capacity for liver regeneration, which  
62 is vital to the organ due to its constant exposure to metabolic and toxic substances.

63 During mouse embryogenesis, liver specification from the ventral foregut endoderm begins at  
64 embryonic day (E)8.5 followed by the formation of the hepatic diverticulum. Circa E9.5,  
65 hepatic endoderm cells, the hepatoblasts, proliferate, delaminate and migrate into the adjacent  
66 septum transversum mesenchyme (STM) to form the liver bud. The hepatoblasts are the  
67 *bona-fide* embryonic progenitors for the future adult hepatocytes and cholangiocytes, whilst  
68 the STM contributes to the prospective hepatic mesenchyme (Medlock and Haar, 1983; Zorn,  
69 2008). The STM and hepatic mesenchyme secrete several growth factors including FGF,  
70 BMP, HGF and Wnt, which promote hepatoblast proliferation, migration and survival  
71 (reviewed in Zorn, Stembook). Histological data at E13.5 shows subsets of hepatoblasts near  
72 the portal mesenchyme upregulate biliary-specific cytokeratins, indicating that biliary  
73 differentiation is initiated by E13.5 (Germain et al., 1988; Lemaigre, 2003). By contrast,  
74 hepatoblasts that are not in contact with portal veins respond to signals from the closely  
75 associated haematopoietic cells in the liver and differentiate into hepatocytes (Zorn, 2008).

76  
77 Previous studies have hinted towards the bi-potential nature of hepatoblasts; initially  
78 immunohistochemical analysis in rats showed that expression of proteins such as  $\gamma$ -glutamyl  
79 transpeptidase, that are detected at low levels in almost all hepatoblasts, become upregulated  
80 and restricted to only differentiated cholangiocytes and not hepatocytes (Germain et al.,  
81 1988). Similarly, hepatoblasts near the portal mesenchyme destined to become  
82 cholangiocytes, transiently express *Afp* and *Alb*, two markers that later become restricted to  
83 hepatocytes (Shiojiri et al., 2001). These reports show that the hepatoblast population  
84 expresses markers of both hepatocytes and cholangiocytes, which later become lineage  
85 restricted. More recent studies have used positive selection of surface markers to isolate  
86 hepatoblasts before characterisation, as reviewed in (Miyajima et al., 2014). However, the  
87 processes that determine how hepatoblasts become fated towards cholangiocytes or  
88 hepatocytes remain largely unclear. It is also still unknown whether a single hepatoblast can  
89 give rise to both cholangiocytes and hepatocytes, *i.e.* whether single hepatoblasts are bi-  
90 potential or if there are multiple populations of unipotent hepatoblasts.

91  
92 During liver development, Wnt signaling represses liver fate during endoderm patterning  
93 (McLin et al., 2007) but is required at E10 for liver bud formation (Micsenyi et al., 2004),  
94 and hepatic proliferation (Tan et al., 2008). The Wnt target gene *Lgr5* was originally  
95 described as a stem cell marker in the context of adult intestinal stem cells (Barker et al.,  
96 2007). Since then *Lgr5* has been reported to be a marker of cycling adult stem cells in many  
97 other organs, such as the stomach, mammary gland and tongue, amongst others (Koo and

98 Clevers, 2014). During development, *Lgr5* has previously been reported as a marker of bi-  
99 potent progenitors in the embryo in the context of mammary cells (Trejo et al., 2017),  
100 embryonic kidney (Barker et al., 2012) and during intestinal development (Kinzel et al.,  
101 2014). In the liver, as well as in the pancreas, *Lgr5* is not expressed under homeostatic  
102 conditions but is induced in progenitor cells in response to damage, (Huch et al., 2013a; Huch  
103 et al., 2013b). Bulk RNAseq analysis of embryonic liver tissue identified many components  
104 of the Wnt pathway, including *Lgr5*, to be differentially expressed in the developing E10.5  
105 liver, compared to the embryonic pancreas (Rodríguez-Seguel et al., 2013). Furthermore,  
106 recent scRNAseq analysis of E11.5 livers reported that the embryonic liver harbours sub-  
107 populations of transcriptionally different hepatoblasts, some of which express *Lgr5* at the  
108 RNA level (Yang et al., 2017). However, these studies did not address whether the  
109 transcriptional heterogeneity observed at the RNA level indeed reflects a genuine functional  
110 heterogeneity of the hepatoblast pool. Also, none of these reports addressed the role of *Lgr5*+  
111 cells during embryonic liver development.

112 Here, by combining multicolour clonal genetic lineage tracing, organoid cultures and  
113 scRNAseq analysis we demonstrate that *Lgr5* marks a subpopulation of *bona-fide* bi-potential  
114 hepatoblasts, which reside at the apex of the hierarchy of an heterogenous hepatoblast pool.

115

116

## 117 **Results**

118

### 119 **Lgr5 is a marker of hepatoblasts in the E9.5 liver**

120

121 Lgr5 has been found to be expressed in the developing liver as early as E10.5 (Rodríguez-  
122 Seguel et al., 2013; Yang et al., 2017). However, these studies were performed solely at the  
123 RNA level and whether Lgr5-expressing cells are genuine hepatoblasts that contribute to  
124 liver development by generating hepatocytes and ductal cells is, at present, unknown. To  
125 formally investigate if Lgr5 marks *bona-fide* hepatoblasts, we used lineage tracing that  
126 enables the identification of all the progeny of a given cell (Kretzschmar and Watt, 2012).  
127 Hence, we generated *Lgr5-CreERT2/R26R-TdTomato* embryos, where upon tamoxifen  
128 induction, *Lgr5*<sup>+</sup> cells and their progeny become labelled with TdTomato. Since hepatoblast  
129 delamination and formation of the liver bud occurs at E9.5 we first assessed whether Lgr5  
130 would be expressed within this very early hepatoblast pool. To this end, we induced E9.5  
131 embryos and collected embryos at E11.5. We found that Lgr5 expression appears as early as  
132 E9.5-E10 (considering the time for tamoxifen to induce deletion) in embryonic liver cells, as  
133 we detected TdTomato<sup>+</sup> fluorescence in the isolated livers (Fig. 1A). We next sought to  
134 address which type of cells expressed Lgr5 during liver development. We found that at  
135 E11.5, the *Lgr5*<sup>+</sup> cells labelled at E9.5 co-expressed alpha fetoprotein (AFP), a well  
136 characterised hepatoblast marker, but did not co-express markers for the endothelial or  
137 hematopoietic lineages, VEGFR3 and CD45, respectively (Fig. 1B,C). Additionally, staining  
138 with Ki67 revealed that over half of the *Lgr5*<sup>+</sup> cells were proliferative (Fig. 1B,C).  
139 Collectively, these results demonstrated the existence of a population of proliferative *Lgr5*<sup>+</sup>  
140 cells with hepatoblast features in the liver bud, as early as E9.5-E10.

141 To assess if these *Lgr5*<sup>+</sup> cells are *bona-fide* hepatoblasts, we analysed their contribution to  
142 the formation of both mature hepatocytes and cholangiocytes in the postnatal liver. To test  
143 this, we induced *Lgr5-CreERT2/R26R-TdTomato* embryos at E9.5 and collected the livers  
144 postnatally, over the course of a year (Fig. 2A). We detected TdTomato<sup>+</sup> descendants of the  
145 initially labelled E9.5-E10 *Lgr5*<sup>+</sup> cells at all timepoints analysed (from 1 month up to 1 year  
146 after birth) in all three functional zones of the liver (zones 1-3) (Fig. 2B). Importantly, we  
147 found both hepatocytes as well as ductal cells (cholangiocytes), as descendants of the E9.5  
148 *Lgr5*<sup>+</sup> hepatoblasts. Remarkably, induction at later time points (E13.5) resulted in only  
149 hepatocyte labelling at 1 month after birth, which indicated that, by E13.5, *Lgr5*<sup>+</sup> embryonic  
150 liver cells are already hepatocyte-fated hepatoblasts (Fig. S1A,B). Of note, induction at  
151 earlier timepoints (E7.5 and E8.5) did not result in any labelled progeny in the postnatal liver  
152 (Fig. S1A), suggesting that embryonic *Lgr5* exclusively marks liver progenitors after  
153 specification and liver bud formation, but not definitive endoderm or foregut progenitors that  
154 will contribute to the prospective liver tissue. No labelling was detected in non-tamoxifen  
155 induced mice (Fig. S1C). Collectively, our lineage tracing results demonstrate that *Lgr5* is  
156 indeed a *bona-fide* hepatoblast marker that identifies E9.5-E10 liver bud hepatic progenitors  
157 with the capacity to give rise to adult hepatocytes and cholangiocytes.

### 158 **Embryonic *Lgr5*<sup>+</sup> cells are *bona-fide* bi-potential hepatoblasts *in vivo***

159

160 To date it has not been clear whether hepatoblasts are truly bipotential *i.e.* whether a single  
161 hepatoblast gives rise to both cholangiocytes and hepatocytes, or conversely whether  
162 hepatoblasts are unipotent and two types of hepatoblasts, progenitors for either hepatocyte or  
163 cholangiocyte fates, coexist within the hepatoblast population. To formally assess whether  
164 our E9.5-E10 *Lgr5*<sup>+</sup> hepatoblasts are indeed bi-potential, we opted to use a multicolour  
165 lineage tracing approach, where single cell clones are labelled with different colours in order  
166 to discriminate the contribution of each individual clone to a given fate. Therefore, we used  
167 lineage tracing with the R26R-Confetti reporter in combination with *Lgr5*-CreERT2, where  
168 following clonal induction with tamoxifen at E9.5, *Lgr5*<sup>+</sup> cells are labelled stochastically  
169 with either RFP, YFP, GFP or CFP (Snippert et al., 2010)(Fig. 3A). As expected, we detected  
170 distinct clones labelled with one of the four fluorescent proteins at all time points analysed  
171 (P0-P17) (Fig. 3B).

172

173 We recently showed that clonal fragmentation due to the expansion of the tissue during  
174 development results in dispersion of clones throughout the tissue, hence imposing an  
175 additional constraint on clonal fate studies during development (Rulands et al., 2018).  
176 Therefore, to ensure that we were scoring cells within individual clones, we opted to only  
177 score as positive bi-potential clones, those clones in the portal tract where ductal cells and  
178 hepatocytes were juxtaposed. We scored 70 individual clones, 81% of which were comprised  
179 only of hepatocytes, whereas no cholangiocyte-only clones were found. Crucially, from all  
180 the clones identified, 37% were identified near a portal tract and half of these (50%)  
181 contained both labelled hepatocytes and cholangiocytes with the same confetti colour (Fig.  
182 3C,D)(Movie S1). As, expected, we also found clones formed of hepatocytes without  
183 cholangiocytes throughout the liver in zones 2 and 3. These results are not explained by clone  
184 merging, *i.e.*, the probability of labelled cells with the same colour counted as a single clone  
185 but originating from two recombination events, since our quantification of merging events  
186 revealed a 1% probability ( $p=0.012$ ) (Fig. S2A,B), indicating that from the 13 bi-potential  
187 clones identified at least 11 clones are truly bi-potent. As before, no labelling was detected in  
188 non-tamoxifen induced mice (Fig. S2C).

189 Therefore, the clonal analysis of *Lgr5*<sup>+</sup> hepatoblasts demonstrates that *Lgr5* marks a  
190 population of E9.5-E10 hepatoblasts in which at least some are fully bi-potential at E9.5 time  
191 point.

192

193

194

### 195 ***Lgr5*<sup>+</sup> embryonic liver cells grow into organoids *in vitro* and generate both ductal and** 196 **hepatocyte fated organoids in culture**

197

198 In the adult liver of mouse (Huch et al., 2013b) and human (Huch et al., 2015), single *Lgr5*<sup>+</sup>  
199 cells grown clonally into cholangiocyte liver organoids retain the bi-potential characteristics  
200 of adult liver cholangiocyte progenitors, being able to self-duplicate while retaining the  
201 capacity to differentiate into both hepatocytes and ductal cells *in vitro*. To assess whether our  
202 *Lgr5*<sup>+</sup> embryonic liver bi-potent hepatoblast would also be able to retain the self-renewing

203 and bi-potent differentiation characteristics in culture if grown into organoids, we sought to  
204 establish liver organoids from Lgr5<sup>+</sup> hepatoblasts and assess their bi-potential characteristics.

205  
206 Recently, further optimization of our protocols to expand human adult liver cells (Huch et al.,  
207 2015) have facilitated the expansion of human embryonic (week 11-20 human gestation)  
208 liver tissue as 3D organoid cultures (Hu et al., 2018). However, the medium requirements to  
209 establish mouse liver organoids from mouse embryonic bi-potent hepatoblasts have not yet  
210 been reported. Hence, we first sought to establish culture conditions that would enable the  
211 expansion of mouse organoid cultures from the embryonic liver. For that, we first opted to  
212 use the entire liver tissue isolated from E10.5 mouse embryonic livers (without selection for  
213 specific hepatoblast cells) and test several conditions in order to establish both cholangiocyte  
214 and hepatocyte organoids from these early progenitors. We opted to use E10.5 instead of  
215 E9.5 embryos for practical reasons; at E9.5 the prospective liver has not yet formed a clear  
216 organ structure and therefore it was not possible to isolate only the liver, which resulted in  
217 contamination from other foregut derived tissues, especially stomach (data not shown). To  
218 establish cholangiocyte organoids from the embryonic liver we optimized our previously  
219 published protocol to expand mouse adult liver organoids (Broutier et al., 2016; Huch et al.,  
220 2013b) by adding TGF $\beta$  inhibitor and Forskolin (Fig. S3A). In parallel, to establish  
221 hepatocyte organoids, we adapted the recently published protocol from human embryonic  
222 liver (Hu et al., 2018) by removing FGF7 during passaging (Fig. S3B). Using these culture  
223 conditions we could expand mouse embryonic liver organoids for up to 5 passages (3 months  
224 in culture).

225 Next, we assessed whether single Lgr5<sup>+</sup> cells isolated from E10.5 livers would retain their  
226 ability to differentiate into either lineage *in vitro* when cultured in our optimized  
227 cholangiocyte and hepatocyte media conditions. To this end, we first established a sorting  
228 strategy that would enable isolation of pure populations of Lgr5<sup>+</sup> E10.5 hepatoblasts,  
229 utilising the Lgr5-GFP mouse line, where the eGFP reporter is knocked-in into the Lgr5 locus  
230 (Barker et al., 2007), combined with co-staining with anti-Liv2, which specifically labels  
231 liver progenitors from E9.5-E13.5 (Nierhoff et al., 2005; Watanabe et al., 2002). We  
232 confirmed the hepatoblast nature of E10.5 Lgr5<sup>+</sup> liver progenitors by co-staining with anti-  
233 Liv2 (Fig. 4A). Given that the developing liver serves as the site of haematopoiesis from  
234 E10.5 until the perinatal stage (Sasaki and Sonoda, 2000), we used negative selection of the  
235 hematopoietic marker CD45 and endothelial marker CD31 to limit contamination by non-  
236 liver progenitor cells. Embryonic livers were collected at E10.5-E12.5, enzymatically  
237 digested and then fluorescence activated cell sorting (FACS) was used to isolate liver  
238 progenitors and also Lgr5<sup>+</sup> hepatoblasts (Fig. S4A). The sorting strategy was sequentially  
239 gated based on cell size, singlets, Liv2<sup>+</sup>/CD31<sup>-</sup>/CD45<sup>-</sup>/Lgr5-GFP<sup>+</sup>. Sorted Lgr5<sup>+</sup> cells were  
240 embedded in Matrigel (as extracellular matrix) and cultured under our two optimized medium  
241 conditions (Fig. 4B). The morphology of structures generated was dependent on the culture  
242 medium used. Addition of 'duct' medium, resulted in the generation of single-layer epithelial  
243 spheres (Fig. 4C). The duct-like morphology of embryonic organoids cultured with 'duct'  
244 medium are reminiscent of adult mouse liver organoids (Huch et al., 2013b). These cultures  
245 expressed the classic cholangiocyte marker-*Krt19* (Fig.4E). Conversely, Lgr5<sup>+</sup> cells cultured

246 with ‘hep’ medium resulted in more compacted, dense and budding, bunch-of-grapes shape,  
247 structures (Fig. 4D), that resembled the recently published human embryonic hepatocyte  
248 organoids (Hu et al., 2018). The hepatocyte nature of the embryonic cells grown with ‘hep’  
249 medium was confirmed by gene expression analysis, which showed high levels of *Albumin* in  
250 the embryonic cells with very low levels of *Krt19* (Fig. 4E). Furthermore,  
251 immunofluorescence analysis of the embryonic cells cultured with ‘hep’ medium confirmed  
252 also their hepatocyte nature, with clear expression of the hepatocyte marker HNF4a and no  
253 detection of the ductal marker EpCAM (Fig. 4F). As expected, they also express *Afp*, a  
254 classic hepatoblast marker (Fig. 4G), which is absent in our adult-derived organoids (Fig.  
255 S3C). Therefore, these results confirm that *Lgr5*<sup>+</sup> hepatoblasts retain self-renewal and  
256 differentiation capacity, being capable of differentiating towards both cholangiocyte and  
257 hepatocyte fates *in vitro*, when grown in our 3D organoid culture conditions.

258

### 259 **scRNAseq identifies distinct heterogeneity within the hepatoblast population**

260

261 To address whether all hepatoblasts express *Lgr5* or whether instead *Lgr5* is a marker of a  
262 specific sub-population of *bona-fide* bipotential hepatoblasts, we performed single cell RNA  
263 sequencing (scRNAseq) analysis on both *Lgr5*<sup>+</sup> hepatoblasts and bulk embryonic liver cells  
264 derived-from either E10.5 or E13.5 livers. To isolate liver progenitors (*Liv2*<sup>+</sup>) and also *Lgr5*<sup>+</sup>  
265 hepatoblasts (*Liv2*<sup>+</sup>*Lgr5*<sup>+</sup>), we applied our established sorting strategy to E10.5 and E13.5  
266 embryonic livers derived from *Lgr5*-GFP mice (Fig. 5A). Therefore, sorted *Liv2*<sup>+</sup>, *CD31*<sup>-</sup>  
267 /*CD45*<sup>-</sup> (*Liv2*<sup>+</sup>, bulk hepatoblast population) and *Liv2*<sup>+</sup>/*CD31*<sup>-</sup>/*CD45*<sup>-</sup>/*Lgr5*-GFP<sup>+</sup> (*Lgr5*<sup>+</sup>  
268 hepatoblasts) were used for single cell RNA sequencing analysis based on the Smart-seq2  
269 protocol (Picelli et al., 2014). scRNAseq analysis was conducted on 943 sorted cells.  
270 Following quality control, 653 cells were taken for further analysis. To reduce technical  
271 variability between biological replicates, we applied batch effect correction by matching  
272 mutual nearest neighbours.

273 To define embryonic liver progenitor populations, we performed dimensionality reduction  
274 using t-distributed stochastic neighbour embedding (tSNE) analysis on all 653 cells (Fig. 5B).  
275 This identified three distinct progenitor populations which were confirmed by Louvain  
276 clustering. These three clusters signified biological differences, since each cluster contained  
277 cells from each biological replicate. The biological differences were confirmed by the  
278 expression of distinct marker genes (Fig. 5B, S4A and Supplementary dataset 1). The cell  
279 type identity of each cluster was assigned based on examining the marker genes and  
280 comparing them to publicly available gene expression patterns in human or mouse liver  
281 (Broutier et al., 2017; Yang et al., 2017). We found that the three clusters corresponded to  
282 proliferating hepatoblasts (HB), hepatocyte-like progenitors (Hep) and cholangiocyte-like  
283 progenitors (Chol), which express higher levels of representative markers. The hepatoblast  
284 cluster contained *Id3*, *Mdk* and *Gpc3*, all described as hepatoblast markers (Su et al., 2017;  
285 Yang et al., 2017) while the hepatocyte-like cluster presented *Ttr*, *Alb*, *Apoa1*, *Apoa2* and *C3*  
286 all known hepatocyte markers and the cholangiocyte-like cluster expressed the ductal cell  
287 genes *Car2*, *Cd44* and *Bcl11a* (Yang et al., 2017) (Fig. 5B and Supplementary dataset 1\_S1-  
288 S7). Of note, within the E10.5 cholangiocyte-like cluster we found two sub-clusters



289 (Supplementary dataset 1\_S7). Although we found known cholangiocyte and hepatocyte  
290 markers, new markers for these clusters were also revealed by the analysis (Fig. S5A and  
291 Supplementary dataset 1\_S1-S7).

292  
293 To establish developmental trajectories between the different cells of the 3 clusters we  
294 calculated diffusion maps and diffusion pseudotime. This analysis revealed a developmental  
295 trajectory originating from the proliferating hepatoblast cluster which bifurcated towards  
296 either the hepatocyte-like cluster or cholangiocyte-like cluster (Fig. 5C). We found the  
297 proliferating hepatoblast cluster contained a higher proportion of cells in G2M phase,  
298 indicating an increased number of proliferative cells (Figs. 5C,S5B). When analysing the  
299 lineage trajectories we took advantage of the *Lgr5*-GFP mouse line (Barker et al., 2007),  
300 which enabled us to identify cells that expressed *Lgr5* RNA via sequencing and compare  
301 whether they were GFP positive from the FACS (Fig. 5D,E). Since the GFP protein is more  
302 stable than the transcript, we used the comparison between the *Lgr5*GFP sorted cells and the  
303 cells expressing *Lgr5* transcript as a proxy to identify the immediate descendants of *Lgr5*+  
304 cells in the scRNAseq population. Notably, most of the *Lgr5*+ cells mapped to the hepatoblast  
305 cluster, representing 2% of the total number of *Liv2*+ hepatoblasts at E10.5 (Fig. S5C).  
306 Interestingly, we observed that as cells exit the hepatoblast cluster and become committed to  
307 either of the two epithelial lineages *Lgr5* transcript levels decrease (Fig. 5D). Many of these  
308 transitioning cells (Fig. 5E, black arrows) were negative for *Lgr5* transcript but positive for  
309 *Lgr5*GFP, indicating that these cells have only recently reduced *Lgr5* levels as the GFP  
310 protein has not yet degraded and can be considered immediate descendants of the *Lgr5*+ pool.  
311 Interestingly, once cells have transitioned to the hepatocyte cluster *Lgr5* is upregulated whilst  
312 *Lgr5* expression is not reinitiated in the cholangiocyte cluster.

313  
314 Segregation of the data by embryonic stage shows that E10.5 cells contribute to the  
315 proliferating hepatoblast cluster, the intermediate cells that are moving from the hepatoblast  
316 towards the hepatocyte-like cluster, the hepatocyte-like cluster and cells located at the far end  
317 of the cholangiocyte-like cluster (Fig. 5F). At E10.5, though, we find very few cells in the  
318 transition between the proliferating hepatoblast and cholangiocyte-like cluster, however,  
319 some of them were *Lgr5*GFP+ that had downregulated *Lgr5* transcript, suggesting that they  
320 were immediate descendants of the E10.5 *Lgr5*+ proliferating hepatoblast cluster cells.  
321 Similarly, cells occupying this intermediate space were readily identified at E13.5, the  
322 majority of which also appear to have recently downregulated *Lgr5*, again indicating that  
323 they were immediate descendants of the *Lgr5*+ cells on the hepatoblast cluster. This implies  
324 that the proliferating *Lgr5*+ hepatoblasts do indeed give rise to cholangiocytes at E10.5 but  
325 with higher proportion at E13.5. Intriguingly, E13.5 cells (either *Lgr5*GFP+ or bulk)  
326 significantly contributed to the cholangiocyte-like cluster, but we did not find E13.5 cells that  
327 mapped to the hepatocyte cluster (Fig. 5F). This result was in striking disagreement with our  
328 knowledge of liver development and our E13.5 lineage tracing results from the *Lgr5*-  
329 *CreERT2* allele, which provides evidence that E13.5 *Lgr5*+ tracing resulted in labelling of  
330 only hepatocytes (Fig. S1B), indicating that at E13.5, cells committed to a hepatocyte fate are  
331 indeed present and express *Lgr5*. Our interpretation of this discrepancy between the lineage  
332 tracing and the scRNAseq data is that the cells along the hepatocyte trajectory from E13.5 no

333 longer express the epitope for the anti-Liv2 antibody used during FACS, and thus were not  
334 subject to sequencing.

335  
336 Together, our scRNAseq analysis suggested that the E10.5 embryonic liver harbours distinct  
337 sub-populations of liver progenitors that co-exist within the hepatoblast pool; a *Lgr5*<sup>+</sup> sub-  
338 population that contributes to both hepatocyte and cholangiocytes and a previously  
339 unrecognized sub-population of already cholangiocyte committed cells that has already  
340 downregulated *Lgr5* and started its specification to the cholangiocyte fate.

### 341 342 ***Lgr5* marks the apex cells within a E9.5 heterogenous hepatoblast pool**

343  
344 Our lineage tracing and single cell RNA sequencing data showed *Lgr5* labels bi-potential  
345 hepatoblasts which differentiate towards hepatocyte or cholangiocyte fates. This is indicative  
346 of a hepatoblast hierarchy, and suggested *Lgr5* as a potential marker of its apex. Quantifying  
347 the number of tracing events as well as their contribution to the postnatal tissue provides  
348 information on the potency and commitment of a given population in the developing tissue.  
349 To determine whether *Lgr5*<sup>+</sup> cells reside at the apex of a developmental hierarchy, we  
350 reasoned that the cell composition of their clonal progeny must reflect quantitatively the  
351 corresponding proportions in tissue. Therefore, we quantified the proportion of labelled  
352 hepatocytes and cholangiocytes following lineage tracing from *Lgr5-CreERT2* at E9.5 (Fig.  
353 6A) and compared the proportions to the homeostatic distributions (Fig. 6B). We found that  
354 the homeostatic proportion of hepatocytes and cholangiocytes in the mouse postnatal liver is  
355  $96.6 \pm 0.6\%$  and  $3.4 \pm 0.6\%$ , respectively, (Fig. S6); in agreement with previous reports in  
356 rats (Blouin et al., 1977). Remarkably, we found that lineage tracing with *Lgr5-CreERT2* at  
357 E9.5 resulted in labelled cells in which  $96.7 \pm 0.5\%$  were hepatocytes and  $3.3 \pm 0.5\%$  were  
358 cholangiocytes, the same proportion of labelled hepatocytes and cholangiocytes as the  
359 homeostatic liver (Fig. 6C). Therefore, although we cannot rigorously rule out the possible  
360 contribution of a parallel *Lgr5*<sup>-</sup> cell lineage that produces differentiated progeny in tissue  
361 proportions, these results strongly suggest that *Lgr5* expression marks hepatoblasts that  
362 constitute the apex of the differential hierarchy.

363  
364 When analysing our single cell RNA sequencing data, we also found that at E10.5 there were  
365 cholangiocyte-like cells that did not express *Lgr5*, suggesting that these were cholangiocyte-  
366 committed hepatoblasts even at this very early time point. To formally investigate whether  
367 this was a genuine functional heterogeneity or was only reflecting transcriptional  
368 heterogeneity at this time point we turned to a second lineage tracing strategy using an  
369 ubiquitous and unbiased driver: the *R26R-CreERT2*. Lineage tracing from *R26R-CreERT2*  
370 will label all cell types in the developing liver, including *Lgr5*<sup>+</sup> and *Lgr5*<sup>-</sup> hepatoblasts, and  
371 therefore labelled hepatocytes and cholangiocytes in postnatal livers will represent  
372 descendants of any hepatoblasts labelled at E9.5 (Fig. 6D). Strikingly, we found a  
373 significantly higher proportion of labelled cholangiocytes compared to the homeostatic  
374 proportion when labelled with the unbiased *R26R-CreERT2* allele at E9.5 (*R26R-CreERT2*,  
375  $7.7 \pm 1.9\%$  cholangiocytes vs  $3.3 \pm 0.5\%$  in homeostasis and with *Lgr5-CreERT2*) (Fig. 6C).  
376 These results were confirmed using multiple multicolour R26R-reporter alleles (R26R-

377 Confetti and R26R-Rainbow). These findings are in agreement with our scRNAseq data, in  
378 which we had observed that E10.5 hepatoblasts were already committed to a cholangiocyte  
379 fate.

380

381 Interestingly, and in contrast to induction at E9.5, Cre induction from the *R26R-CreERT2*  
382 allele at E13.5 gave rise to labelled hepatocytes and cholangiocytes in homeostatic  
383 proportions (Fig. 6C), whilst lineage tracing from the *Lgr5-CreERT2* allele at E13.5 gave rise  
384 solely to labelled hepatocytes (Fig. 6C), suggesting that *Lgr5*<sup>+</sup> cells lose their potency and  
385 position in the hierarchy during the developmental progression. These results indicate that  
386 hepatoblasts are not only heterogeneous in progenitor potential but their competence to  
387 generate hepatocytes and cholangiocytes changes between E9.5 and E13.5.

388

389 In addition to the identity of labelled cells, the size of labelled clusters generated from the  
390 *Lgr5-CreERT2* and *R26R-CreERT2* alleles was quantified as a proxy for the proliferative  
391 potential of the initially labelled hepatoblast. We found that tracing with the *Lgr5-CreERT2*  
392 allele at E9.5 gave rise to larger clusters of labelled cells than tracing with the *R26R-*  
393 *CreERT2* allele (Fig. 6E,F). The larger cluster sizes from *Lgr5*<sup>+</sup> hepatoblasts indicate that  
394 these cells have a greater proliferative potential than the bulk hepatoblast population, again  
395 suggestive of their position at the apex of the hepatoblast hierarchy.

396

397 Altogether combined, these results lead us to conclude that the E9.5 hepatoblast population is  
398 indeed functionally heterogeneous, with *Lgr5*<sup>+</sup> hepatoblasts residing at the apex of the E9.5  
399 hierarchy and a population of non-*Lgr5*<sup>+</sup> hepatoblasts exhibiting a previous unidentified early  
400 commitment to the cholangiocyte fate.

401

402

## 403 Discussion

404

405 The Wnt target gene *Lgr5* (leucine-rich-repeat-containing G-protein-coupled receptor 5) has  
406 been described as a marker of stem cells in non-damaged, self-renewing tissues, such as the  
407 intestine, stomach and hair follicles, as reviewed in (Barker et al., 2010). In the adult liver,  
408 *Lgr5* is lowly expressed during homeostasis. However, upon damage *Lgr5* becomes highly  
409 upregulated in a subset of cells, which contribute to the regeneration of both, hepatocytes and  
410 ductal cells. Similarly, *Lgr5* is also upregulated in homeostatic liver ductal cells, when  
411 cultured as self-renewing bi-potential liver organoids (Huch et al., 2013b). Here we found  
412 that *Lgr5* marks a previously unknown bi-potent *Lgr5*<sup>+</sup> population, which resides at the apex  
413 of an E9.5 heterogenous hepatoblast pool.

414 To date, bi-potentiality of hepatoblasts has only been shown at the population level  
415 (Yanagida et al., 2016), however, at least *in vivo*, there has been no experimental proof  
416 regarding bi-potentiality of individual hepatoblast cells. A recent report showed that a  
417 labelled *Foxa2*<sup>+</sup> definitive endoderm cell induced at E7.75 gives rise to cells moving towards  
418 hepatocyte and cholangiocyte fates at E16.5, suggesting that at least, before hepatic  
419 specification at E7.75, the definitive endoderm progenitors are multipotent (El Sebae et al.,  
420 2018). Similarly, *in vitro*, *Dlk*<sup>+</sup> embryonic liver cells at E14.5 were found to express markers  
421 of both hepatocyte and cholangiocyte lineages (Tanimizu et al., 2003), again suggestive of  
422 the bi-potent nature of hepatoblast cells. However, formal proof of *in vivo* bi-potential  
423 hepatoblasts has not yet been provided. Here, using lineage tracing with a multicolour  
424 reporter we unequivocally demonstrate that E9.5 *Lgr5*<sup>+</sup> hepatoblasts are indeed bi-potential  
425 *in vivo*, as single clones consisting of cholangiocytes and hepatocytes are present at the portal  
426 triad (Fig. 3C,D). It should be noted, though, that we also found clones formed of hepatocytes  
427 without cholangiocytes throughout the liver; including in the portal region (zone 1). These  
428 can have two possible explanations: either a subset of *Lgr5*<sup>+</sup> cells is unipotent for hepatocyte  
429 fate and others are bi-potent, or alternatively, all the *Lgr5*<sup>+</sup> cells are bi-potent. The first option  
430 (only a subset is bi-potent) implies that there is heterogeneity within the *Lgr5*<sup>+</sup> population  
431 regarding their potentiality. In that regard, our single cell data, where we find *Lgr5*<sup>+</sup> cells in  
432 both the hepatoblast and the hepatocyte clusters, suggest that this could indeed be a plausible  
433 scenario. Alternatively, one could hypothesise that all the *Lgr5*<sup>+</sup> cells are bi-potent but  
434 depending on the external signals received according to the specific position of the original  
435 *Lgr5*<sup>+</sup> progenitor cell, they can differentiate into one or two cell types. This implies that  
436 developmental stage and local environment could be critical in defining the final fate of a  
437 given *Lgr5*<sup>+</sup> hepatoblast. In that regard, the fact that embryonic *Lgr5*<sup>+</sup> cells isolated by  
438 FACS and cultured *in vitro* were sensitive to the growth factors present in the culture medium  
439 and committed either to the cholangiocyte or hepatocyte lineage according to media  
440 composition would argue in support of this latter argument (Fig. 4). It is tempting to  
441 speculate that by retaining *Lgr5*<sup>+</sup> cells at defined positions during liver growth by  
442 maintenance of a specific local environment, differentiation into cholangiocytes would occur  
443 as daughter cells exited such a niche. This is consistent with current evidence of the  
444 discontinuous growth of the liver ductal network as reviewed in (Ober and Lemaigre, 2018),

445 although there is at present no direct evidence for a role of *Lgr5*<sup>+</sup> cells in directing liver  
446 morphogenesis.

447 Interestingly, lineage tracing at E13.5 from the *Lgr5-CreERT2* allele resulted in labelling of  
448 only hepatocytes (Fig. 6C,S1B), while E13.5 lineage tracing from the *R26R-CreERT2* allele  
449 resulted in labelling of both, hepatocytes and ductal cells, in the homeostatic proportions  
450 (96.4% and 3.6%, respectively). These results underline the continual shift in cell potency  
451 and cell surface marker expression throughout development of the liver and are consistent  
452 with other reports in which a single cell surface marker is not adequate to define a particular  
453 cell type (hepatoblast, hepatocyte or cholangiocyte) throughout the entirety of liver  
454 development (Tanaka et al., 2009). Instead, a set of two or more cell surface markers will  
455 have to be used to define each cell type at specific stages of development. In that regard we  
456 found that while *Liv2* is indeed a good marker of the hepatoblast pool at E10.5, it is not  
457 appropriate to identify unbiased hepatoblasts at E13.5, as it seems to mark hepatoblasts  
458 already biased towards the ductal fate.

459  
460 In contrast to the widely accepted view that differentiation of hepatoblasts into  
461 cholangiocytes occurs from E13.5 onwards (Gordillo et al., 2015), our results provide the  
462 functional demonstration that heterogeneity indeed already exists at E9.5 of liver  
463 development. Our single cell RNA sequencing data shows that even as early as E10.5 there is  
464 heterogeneity within the hepatoblast population, with some cells already moving towards  
465 cholangiocyte or hepatocyte fates. We identify sub-populations of hepatoblasts that express  
466 *Lgr5* whilst other sub-populations do not. Further, some of these *Lgr5*<sup>-</sup> cells already express  
467 markers of the cholangiocyte fate. In support of the scRNAseq data, our functional studies  
468 which fate map E9.5 liver progenitors using lineage tracing from either *Lgr5-CreERT2* or  
469 *R26R-CreERT2* demonstrate the existence of both *Lgr5*<sup>+</sup> and *Lgr5*<sup>-</sup> hepatoblasts already at  
470 E9.5 (Fig. 6C). Importantly, induction of lineage tracing at E9.5 using *Lgr5-CreERT2*, but  
471 not *R26R-CreERT2*, resulted in labelled postnatal hepatocytes and cholangiocytes in  
472 homeostatic proportions (97% hepatocytes vs 3% cholangiocytes), implying that *Lgr5*<sup>+</sup> cells  
473 functionally behave as a genuine bi-potent hepatoblast and are indeed at the apex of its  
474 hepatoblast hierarchy. On the contrary, the unbiased *R26R-CreERT2*, gave rise to a higher  
475 proportion of cholangiocytes at E9.5, compared to the homeostatic or *Lgr5*<sup>+</sup> descendants,  
476 arguing in favour of an already cholangiocyte-committed hepatoblast sub-population,  
477 negative for *Lgr5*, in the E9.5 developing liver. This result suggests that E9.5 *Lgr5*<sup>+</sup> cells are  
478 at the apex of their hierarchy, i.e., are bi-potent and equipotent, and are able to give rise to  
479 already lineage-restricted ductal progenitors that downregulate *Lgr5* and expand in order to  
480 contribute to the postnatal ductal pool. While our results demonstrate that *Lgr5* expression  
481 overlaps with the apex of an hepatoblast pool, they do not show functionally that *Lgr5*  
482 expression defines the apex of the hepatoblast pool. *Lgr5* expression could be subjected to  
483 local environmental factors and just mark a subpopulation of cells that receives high Wnt  
484 signalling. Then, one could speculate that *Lgr5*<sup>-</sup> hepatoblasts with the very same  
485 potency as the *Lgr5*<sup>+</sup> ones also reside at the apex of their own hierarchies. This implies that  
486 populations of equally potent hepatoblasts, some of which express *Lgr5* and are bi-potent, co-

487 exist at this time point in development. If these additional hepatoblasts populations indeed  
488 exist, what is their identity and bi-potentiality are still questions that remain to be addressed.

489

490 In summary, here, using a combination of lineage tracing, organoid cultures and scRNAseq  
491 analysis we describe for the first time that the E9.5 hepatoblast pool is heterogeneous, not  
492 only at the RNA, but also at the functional level. Within the different E9.5 hepatoblast sub-  
493 populations, we find that *Lgr5* marks a previously unknown bi-potent *Lgr5*<sup>+</sup> population,  
494 which resides at the apex of its E9.5 hepatoblast hierarchy. Furthermore, we also describe a  
495 previously un-identified sub-population of already cholangiocyte-committed cells that do not  
496 express *Lgr5*. To our knowledge, this is the first report that recognizes the functional  
497 heterogeneity of the E9.5 hepatoblast pool and the first demonstration that *Lgr5* is a *bona-fide*  
498 marker of early bi-potent hepatoblasts in the developing liver. Our studies raise further  
499 questions about the nature of *Lgr5* in liver development and liver morphogenesis. Wnt  
500 signalling has been implicated in liver growth (McLin et al., 2007; Micsenyi et al., 2004; Tan  
501 et al., 2008), however its role in determining the potency of hepatoblasts is unknown.  
502 Elucidating the functional role, if any, for *Lgr5* in liver development could help to clarify the  
503 part played by Wnt signalling. In our hands, KO of the *Lgr5* gene did not result in an  
504 apparent liver phenotype (Fig. S7). However, the presence of other homologues, like *Lgr4*,  
505 which is expressed during liver development (Camp et al., 2017), could compensate for the  
506 loss of function of *Lgr5*, as it is reported for the adult intestine (de Lau et al., 2011).  
507 Therefore, it remains unclear whether *Lgr5 per se* has a functional role in liver development.  
508 Similarly, cell ablation studies would be required to address whether the *Lgr5*<sup>+</sup> hepatoblast  
509 rather than the *Lgr5* gene *per se* is indeed required during development. Due to the wide-  
510 spread expression of *Lgr5*<sup>+</sup> stem cells in the adult and in other embryonic tissues, it is not  
511 trivial to assess the functionality of *Lgr5*<sup>+</sup> cells in a specific tissue. We have shown that  
512 isolated *Lgr5*<sup>+</sup> hepatoblasts can be cultured *in vitro*, and so this may provide a reductionist  
513 system in which we can test the requirement for *Lgr5* in establishing or maintaining bi-  
514 potency in hepatoblasts without the confounding effects of signalling from other tissues.  
515 Future studies would aim at addressing these questions.

516

517

## 518 **Materials and Methods**

### 519 **Mouse strains and animal work**

520 Lgr5-CreERT2 (Huch et al., 2013b), Lgr5-GFP (Barker et al., 2007), R26R-TdTomato  
521 (Madisen et al., 2010), R26R-Confetti (Snippert et al., 2010) and R26R-CreERT2 (Ventura et  
522 al., 2007) and R26R-Rainbow1.0 (Livet et al., 2007) mice were described previously. All  
523 mouse experiments have been regulated under the Animals (Scientific Procedures) Act 1986  
524 Amendment Regulations 2012 following ethical review by the University of Cambridge  
525 Animal Welfare and Ethical Review Body (AWERB) and have been performed in  
526 accordance with the Home Office license awarded to M.H.

### 527 **Tamoxifen induction**

528 Lineage tracing was performed using the R26R-TdTomato or R26R-Confetti or R26R-  
529 rainbow reporter in combination with a temporally inducible Cre, either Lgr5-CreERT2 or  
530 R26R-CreERT2. To induce Cre activity tamoxifen (Sigma, T5648) was administered by  
531 intraperitoneal injection of the pregnant female at E9.5. Tamoxifen doses were dependent on  
532 the reporter line and Cre line used. For details refer to Supplementary dataset 2. Embryos and  
533 pups (male and females) were then collected at specified time points according to the  
534 experiment.

### 535 **Tissue preparation and immunostaining**

536 Embryonic and postnatal livers were dissected and fixed for 2 h or 24 h, respectively in 10%  
537 neutral- buffered formalin (Sigma-Aldrich) at 4°C. Postnatal livers were embedded in 4% low  
538 melting point agarose (BioRad Laboratories) and sectioned at 100µm using a Leica VT1000S  
539 microtome. To reduce nonspecific staining and permeabilize the sample, samples were  
540 incubated with a 2% donkey serum, 1% Triton, 5% DMSO in PBS solution overnight at 4°C.  
541 Primary antibodies were then applied at appropriate dilutions for 48 h at 4°C. Samples were  
542 washed and secondary antibodies applied at dilution 1:250 for 48 h at 4°C. Nuclei were  
543 counterstained with Hoescht 33342 (1:1000, Invitrogen) for 30 min at room temperature.  
544

### 545 **Confocal Imaging**

546 Samples were imaged on a SP8 White Light inverted confocal microscope (Leica  
547 Microsystems) through a 10x or 20x objective using a Leica application suite X Software.  
548 Optical sections were acquired at 2µm intervals. Images were processed using Fiji.  
549

### 550 **Isolation of cells for single cell RNA sequencing and *in vitro* culture**

551 Lgr5GFP<sup>het</sup> and Lgr5GFP<sup>-/-</sup> embryos were collected at the specified timepoints and screened  
552 for GFP signal under an epi-florescence microscope. Once classified according to phenotype,  
553 livers were collected and minced before enzymatic digestion. Enzymatic digestion was  
554 performed at 37°C with Wash medium (constituting DMEM+ GlutaMAX (Invitrogen)  
555 supplemented with 1% FBS and 1x penicillin/streptomycin) containing 0.125 mg/ml  
556 Collagenase Type I (Sigma-Aldrich) and Dispase II (Gibco) and 0.1 mg/ml DNase (Sigma  
557 Aldrich). The incubation time for enzymatic digestion was approximately 40 min for E10.5  
558 livers and 2 h for E13.5 livers. Once the digestion to single cells was confirmed by visual

559 inspection, samples were filtered through a 40  $\mu\text{m}$  pore size nylon cell strainer (Falcon) and  
560 centrifuged at 400 g for 5mins. The pellet was resuspended in blocking solution (Wash  
561 medium with 2% FBS, Rho kinase inhibitor Y27632 (Sigma Aldrich) and 0.1 mg/ml DNase  
562 for 20 min. Cells were then centrifuged at 400 g for 5 min and incubated with primary  
563 antibody against Liv2 (1:100, MBL) in washing medium supplemented with rock inhibitor  
564 and DNase for 40 min on ice. Cells were then pelleted at 400 g for 5 min and washed. Cells  
565 were incubated with APC anti-rat (Biolegend) for anti-Liv2, CD31-PE/Cy7 (abcam) and  
566 CD45-PE/Cy7 (Bioscience) diluted in washing medium for 40 min on ice. The sorting  
567 strategy consisted of a population of single cells that were sequentially gated based on cell  
568 size (forward scatter, FSC, versus side scatter, SSC), singlets (pulse width vs FSC) and Liv2-  
569 APC positivity. Finally, CD45-PE/Cy7 (BD Biosciences), CD31-PE/Cy7 (Abcam) antibodies  
570 were used in order to exclude blood cells and endothelium. Liv2<sup>+</sup>/CD31<sup>-</sup>/CD45<sup>-</sup> (bulk  
571 hepatoblast pool) or Liv2<sup>+</sup>/CD31<sup>-</sup>/CD45<sup>-</sup>/GFP<sup>+</sup> cells (named as Lgr5<sup>+</sup> cells) were used for  
572 further analysis.

573  
574 For single cell RNA sequencing experiments cells were sorted on an influx Cell Sorter (BD  
575 Biosciences). Single cells were collected in non-skirted PCR plates containing lysis buffer  
576 (0.2% triton (Sigma triton X-100 solution) in 1 U per  $\mu\text{l}$  RNase inhibitor (Thermo Fisher  
577 Scientific) in DEPC-water (Ambion)). Plates were then vortexed and centrifuged at 2000 rpm  
578 for 2 mins and kept at -80°C. For 3D *in vitro* culture cells were sorted on a MoFlo into sort  
579 medium (Advanced DMEM/F12 (GIBCO) supplemented with 1% penicillin/streptomycin,  
580 1% Glutamax, 10 mM HEPES, 1x B27 supplement (without vitamin A), 1.25 mM N-acetyl-l-  
581 cysteine, 10% (vol/vol) Rspo-1 conditioned medium, 10 mM Nicotinamide, 10 nM  
582 recombinant human (Leu15)-gastrin I, 50 ng/ml recombinant mouse EGF, 100 ng/ml  
583 recombinant human FGF10, 25 ng/ml recombinant human HGF, 5  $\mu\text{M}$  A8301, and 10  $\mu\text{M}$   
584 Y27632.

585  
586 **Single cell RNA sequencing**  
587 scRNA-seq sample preparation was performed with an adapted version of Smartseq2 (Picelli  
588 et al., 2014). cDNA was reverse transcribed using 50 U. reaction SmartScribe Reverse  
589 Transcriptase (Takara ClonTech) without Betaine and MgCl<sub>2</sub> and amplified using KAPA  
590 HiFi Hotstart polymerase (Roche). Illumina Nextera XT DNA preparation kit was used to  
591 prepare libraries and pooled libraries were sequenced using the Illumina HiSeq 4000 system  
592 (single-end 50 bp reads). The quality of the reads was examined with FastQC  
593 (<http://www.bioinformatics.babraham.ac.uk/projects/fastqc/>). The reads were aligned to  
594 genome version GRCm38, with the 92 Spike-in transcript sequences added, using STAR  
595 (v2.6.0c) and Ensemble gene annotation version 93 (Kersey et al., 2018). subread (v1.6.2)  
596 was used to count uniquely aligned reads using the same Ensemble annotation and to create  
597 the count matrix. Further analysis was performed using scanpy (v1.3.3) (Wolf et al., 2018b).  
598 For quality control of cells, the following quality metrics were calculated for each cell: (1)  
599 the percentage mitochondrial transcript reads, (2) the percentage of Spike-In reads, (3) the  
600 total number of reads, and (4) the log<sub>10</sub> transformed number of genes with at least one read.  
601 Only cells with (1) less than 20% of mitochondrial reads, (2) less than 25% Spike-In reads  
602 and (3) more than 100,000 reads were considered for downstream analysis. As the log<sub>10</sub>



603 transformed number of genes with at least one read (4) showed clear batch effects, the four  
604 different thresholds 3.6, 3.5, 3.7, and 3.5 were applied to the four different sorts and only  
605 cells exceeding these thresholds passed quality control. In total, 653 (69%) of 943 cells were  
606 considered for downstream analysis. Because an initial principal component analysis revealed  
607 batch effects between the biological replicates from experiments 1, 2 and 4 (group 1) on the  
608 one hand and experiment 3 (group 2) on the other hand, batch correction between those two  
609 groups was performed: For each group, only genes expressed in at least 3 cells were  
610 considered. The counts in each group were normalised using size factors computed with the  
611 `scran` (v1.8.4) function `computeSumFactors` (parameters: `min_mean=1.0`, `size=seq(20, 100,`  
612 `5)`) (Lun et al., 2016). For each group, highly variable genes were detected using the `scanpy`  
613 function `filter_genes_dispersion` (parameter: `max_mean=8`) and the intersection of both gene  
614 sets, which contained 1766 genes, was used for further analysis. Batch effects between the  
615 two datasets were corrected by matching mutual nearest neighbours in the implementation of  
616 `mnnpy` (v0.1.9.3) (parameters: `svd_mode='irlb'`) (Lun et al., 2016). On the resulting count  
617 matrix, a principal component analysis was performed. t-SNE dimensionality reduction was  
618 performed on the first 20 principal components using the `MulticoreTSNE` implementation  
619 (parameters: `perplexity=80`, `early_exageration=12`) (Amir et al., 2013). To perform Louvain  
620 clustering, the 15-nearest neighbours graph was computed on the first 20 principal  
621 components. Using Louvain clustering with the resolution parameter set to 0.05, 3 clusters  
622 were obtained (Levine et al., 2015; Subelj and Bajec, 2011). Differentially expressed genes  
623 were detected by performing a Wilcoxon rank-sum test on the raw counts comparing each  
624 cluster against the union of the other two clusters as implemented in `scanpy`'s  
625 `rank_genes_groups` function. To define marker genes for the clusters at specific embryonic  
626 stages, the cells were grouped according to cluster and stage and a Wilcoxon rank-sum test  
627 was performed as described above. For the sub-clustering of the cholangiocyte-like cluster, a  
628 principal component analysis was performed on those cells and then clustering was  
629 performed as above with the resolution parameter set to 0.5. Differentially expressed genes  
630 between the two resulting sub-clusters were detected as described above. The diffusion maps  
631 were calculated using the `scanpy` function `diffmap` with the width of the Gaussian  
632 connectivity kernel being implicitly determined by the distance to the 100 nearest neighbours  
633 in the space of the 20 first principal components (Coifman et al., 2005; Haghverdi et al.,  
634 2015). Diffusion pseudotime was calculated using `scanpy`'s `dpt` function using the cell with  
635 minimal diffusion component 1 as root cell (Haghverdi et al., 2016; Wolf et al., 2018a). Cell  
636 cycle phases were assigned using `cyclone` and the pre-trained mouse cycle markers contained  
637 in the `scran` package (Scialdone et al., 2015). Cells were classified as `Lgr5` positive on the  
638 transcript level if they had more than 10 reads of `Lgr5`.

639  
640

### 641 **3D culture of embryonic liver cells**

642 Following isolation as described in isolation section above, the cells were pelleted at 400g  
643 and seeded in Matrigel (BD Biosciences) and cultured either with the 'hep' protocol or  
644 'ductal' protocol. The 'hep' method involves culturing for the first 3 days in Advanced  
645 DMEM F12 supplemented with Penicillin/Streptomycin, Glutamax and HEPES (Gibco),  
646 1xB27 (Gibco), 500 nM n-Acetylcysteine (Sigma), 10 mM Nicotinamide (Sigma), 100 ng/ml

647 FGF10 (Peprotech), 100 ng/ml FGF7 (Peprotech), 50 ng/ml HGF (Peprotech), 10 nM Gastrin  
648 (Sigma), 50 ng/ml EGF (Peprotech), 1 nM A83-01 (Tocris Bioscience), 3 $\mu$ M CHIR 99021  
649 (Tocris Bioscience), 15% R-spondin 1 conditioned medium (in house), and 10  $\mu$ M Rock  
650 inhibitor Y-27632 (Sigma). From day 3 onwards the culture medium was modified by the  
651 exclusion of FGF7. The 'ductal' method consists of culturing for the first 3 days in Advanced  
652 DMEM F12 supplemented with Penicillin/Streptomycin, Glutamax and HEPES 1xB27, 500  
653 nM n-Acetylcysteine, 10 mM Nicotinamide, 100 ng/ml FGF10, 50 ng/ml HGF, 10 nM  
654 Gastrin, 25 ng/ml Noggin (Peprotech), 50 ng/ml EGF, 1 nM A83-01, 10 $\mu$ M Forskolin (Tocris  
655 Bioscience), 10% R-spondin 1 conditioned medium, 30% Wnt conditioned medium (in  
656 house) and 10  $\mu$ M Rock inhibitor Y-27632 (Sigma). From day 3 onwards the culture medium  
657 was modified by the exclusion of the Wnt conditioned medium and removal of Noggin. After  
658 several days in culture, organoid structures with either a cystic (duct) or solid (hep) form  
659 arose. Cultures were split at 1:2 ratio after 14-20 days.

660

661 **Acknowledgements**

662

663 We would like to acknowledge the Gurdon Institute Animal facility and Richard Butler at the  
664 Gurdon Institute Imaging Facility for microscopy and image analysis support. Andy Riddell  
665 and Simon McCallum for cell sorting. Robert Arnes-Benito for help in sectioning in the early  
666 phases of the project. Rachel Tan for help with counting.

667

668

669

670 **Competing interests**

671

672 No competing interests declared.

673

674

675 **Author contributions**

676 Conceptualization: N.P., C.J.H, B.D.S, M.H.; Methodology: N.P., C.J.H., W.L., M.H.;  
677 Software: F.R., S.R.; Validation: N.P., E.M.E.; Formal analysis: N.P., F.R., S.R.;  
678 Investigation: N.P., C.J.H., E.M.E.; Resources: B.D.S., M.H.; Data curation: F.R., S.R.;  
679 Writing - original draft: N.P., M.H.; Writing - review & editing: N.P., C.J.H., F.R., S.R.,  
680 B.D.S., M.H.; Supervision: B.G., S.R., B.D.S., M.H.; Project administration: M.H.; Funding  
681 acquisition: B.D.S., M.H.

682

683

684 **Funding**

685

686 M.H. is a Wellcome Trust Sir Henry Dale Fellow and is jointly funded by the Wellcome  
687 Trust and the Royal Society (104151/Z/14/Z); M.H. and N.P. are funded by a Horizon 2020  
688 grant (LSFM4LIFE). C.H. was funded by a Cambridge Stem Cell Institute Seed funding for  
689 interdisciplinary research awarded to M.H. and B.D.S. W.L. and B.G. were supported by  
690 programmatic funding from the Wellcome Trust, CRUK and Bloodwise, core infrastructure  
691 support from the Wellcome and MRC to the Wellcome & MRC Cambridge Stem Cell  
692 Institute, and an MRC Clinical Research Infrastructure grant supporting single cell molecular  
693 analysis. S.R. was funded on a Herchel-Smith Fellowship.

694

695

696 **Data availability**

697

698 Generated datasets have been deposited in GEO under accession number GSE123103.

699

700

701 **References**

702

703 **Amir, E. D., Davis, K. L., Tadmor, M. D., Simonds, E. F., Levine, J. H., Bendall, S. C.,**  
704 **Shenfeld, D. K., Krishnaswamy, S., Nolan, G. P. and Pe'er, D. (2013).** viSNE enables  
705 visualization of high dimensional single-cell data and reveals phenotypic heterogeneity  
706 of leukemia. *Nat. Biotechnol.* **31**, 545–552.

707 **Amir, E. D., Davis, K. L., Tadmor, M. D., Simonds, E. F., Levine, J. H., Bendall, S. C.,**  
708 **Shenfeld, D. K., Krishnaswamy, S., Nolan, G. P. and Pe'er, D. (2013).** viSNE enables  
709 visualization of high dimensional single-cell data and reveals phenotypic heterogeneity  
710 of leukemia. *Nat. Biotechnol.* **31**, 545–552.

711 **Barker, N., van Es, J. H., Kuipers, J., Kujala, P., van den Born, M., Cozijnsen, M.,**  
712 **Haegbarth, A., Korving, J., Begthel, H., Peters, P. J., et al. (2007).** Identification of  
713 stem cells in small intestine and colon by marker gene *Lgr5*. *Nature* **449**, 1003–1007.

714 **Barker, N., Bartfeld, S. and Clevers, H. (2010).** Tissue-Resident Adult Stem Cell Populations  
715 of Rapidly Self-Renewing Organs. *Cell Stem Cell* **7**, 656–670.

716 **Barker, N., Rookmaaker, M. B., Kujala, P., Ng, A., Leushacke, M., Snippert, H.,**  
717 **van de Wetering, M., Tan, S., Van Es, J. H., Huch, M., et al. (2012).** *Lgr5*+ve  
718 Stem/Progenitor Cells Contribute to Nephron Formation during Kidney Development.  
719 *Cell Rep.* **2**, 540–552.

720 **Blouin, A., Bolender, R. P. and Weibel, E. R. (1977).** Distribution of organelles and  
721 membranes between hepatocytes and nonhepatocytes in the rat liver parenchyma. A  
722 stereological study. *J. Cell Biol.* **72**, 441–455.

723 **Broutier, L., Andersson-Rolf, A., Hindley, C. J., Boj, S. F., Clevers, H., Koo, B.-K. and Huch,**  
724 **M. (2016).** Culture and establishment of self-renewing human and mouse adult liver  
725 and pancreas 3D organoids and their genetic manipulation. *Nat. Protoc.* **11**, 1724–  
726 1743.

727 **Broutier, L., Mastrogiovanni, G., Verstegen, M. M., Francies, H. E., Gavarró, L. M.,**  
728 **Bradshaw, C. R., Allen, G. E., Arnes-Benito, R., Sidorova, O., Gaspersz, M. P., et al.**  
729 (2017). Human primary liver cancer–derived organoid cultures for disease modeling  
730 and drug screening. *Nat. Med.* **23**, 1424–1435.

731 **Camp, J. G., Sekine, K., Gerber, T., Loeffler-Wirth, H., Binder, H., Gac, M., Kanton, S.,**  
732 **Kageyama, J., Damm, G., Seehofer, D., et al. (2017).** Multilineage communication  
733 regulates human liver bud development from pluripotency. *Nature* **546**, 533.

734 **Coifman, R. R., Lafon, S., Lee, A. B., Maggioni, M., Nadler, B., Warner, F. and Zucker, S. W.**  
735 (2005). Geometric diffusions as a tool for harmonic analysis and structure definition of  
736 data: diffusion maps. *Proc. Natl. Acad. Sci. U. S. A.* **102**, 7426–31.

737 **de Lau, W., Barker, N., Low, T. Y., Koo, B.-K., Li, V. S. W., Teunissen, H., Kujala, P.,**  
738 **Haegbarth, A., Peters, P. J., van de Wetering, M., et al. (2011).** *Lgr5* homologues  
739 associate with Wnt receptors and mediate R-spondin signalling. *Nature* **476**, 293–297.

740 **El Sebae, G. K., Malatos, J. M., Cone, M.-K. E., Rhee, S., Angelo, J. R., Mager, J. and**  
741 **Tremblay, K. D. (2018).** Single-cell murine genetic fate mapping reveals bipotential  
742 hepatoblasts and novel multi-organ endoderm progenitors. *Development* **145**,  
743 dev.168658.

744 **Germain, L., Blouin, M. J. and Marceau, N. (1988).** Biliary epithelial and hepatocytic cell  
745 lineage relationships in embryonic rat liver as determined by the differential expression  
746 of cytokeratins, alpha-fetoprotein, albumin, and cell surface-exposed components.  
747 *Cancer Res.* **48**, 4909–18.

- 748 **Gordillo, M., Evans, T. and Gouon-Evans, V.** (2015). Orchestrating liver development.  
749 *Development* **142**, 2094–2108.
- 750 **Haghverdi, L., Buettner, F. and Theis, F. J.** (2015). Diffusion maps for high-dimensional  
751 single-cell analysis of differentiation data. *Bioinformatics* **31**, 2989–2998.
- 752 **Haghverdi, L., Büttner, M., Wolf, F. A., Buettner, F. and Theis, F. J.** (2016). Diffusion  
753 pseudotime robustly reconstructs lineage branching. *Nat. Methods* **13**, 845–848.
- 754 **Hu, H., Gehart, H., Artegiani, B., López-Iglesias, C., Dekkers, F., Basak, O., van Es, J., Chuva  
755 de Sousa Lopes, S. M., Begthel, H., Korving, J., et al.** (2018). Long-Term Expansion of  
756 Functional Mouse and Human Hepatocytes as 3D Organoids. *Cell* **175**, 1591–1606.e19.
- 757 **Huch, M., Bonfanti, P., Boj, S. F., Sato, T., Loomans, C. J. M., van de Wetering, M., Sojoodi,  
758 M., Li, V. S. W., Schuijers, J., Gracanin, A., et al.** (2013a). Unlimited in vitro expansion  
759 of adult bi-potent pancreas progenitors through the Lgr5/R-spondin axis. *EMBO J.* **32**,  
760 2708–2721.
- 761 **Huch, M., Dorrell, C., Boj, S. F., van Es, J. H., Li, V. S. W., van de Wetering, M., Sato, T.,  
762 Hamer, K., Sasaki, N., Finegold, M. J., et al.** (2013b). In vitro expansion of single Lgr5+  
763 liver stem cells induced by Wnt-driven regeneration. *Nature* **494**, 247–250.
- 764 **Huch, M., Gehart, H., van Boxtel, R., Hamer, K., Blokzijl, F., Verstegen, M. M. A., van  
765 Wenum, M., Fuchs, S. A., de Ligt, J., van de Wetering, M., et al.** (2015). Long-Term  
766 Culture of Genome-Stable Bipotent Stem Cells from Adult Human Liver. *Cell* **160**, 299–  
767 312.
- 768 **Kersey, P. J., Allen, J. E., Allot, A., Barba, M., Boddu, S., Bolt, B. J., Carvalho-Silva, D.,  
769 Christensen, M., Davis, P., Grabmueller, C., et al.** (2018). Ensembl Genomes 2018: an  
770 integrated omics infrastructure for non-vertebrate species. *Nucleic Acids Res.* **46**,  
771 D802–D808.
- 772 **Kinzel, B., Pikiólek, M., Orsini, V., Sprunger, J., Isken, A., Zietzling, S., Desplanches, M.,  
773 Dubost, V., Breustedt, D., Valdez, R., et al.** (2014). Functional roles of Lgr4 and Lgr5 in  
774 embryonic gut, kidney and skin development in mice. *Dev. Biol.* **390**, 181–190.
- 775 **Koo, B.-K. and Clevers, H.** (2014). Stem cells marked by the R-spondin receptor LGR5.  
776 *Gastroenterology* **147**, 289–302.
- 777 **Kretzschmar, K. and Watt, F. M.** (2012). Lineage Tracing. *Cell* **148**, 33–45.
- 778 **Lemaigre, F. P.** (2003). Development of the biliary tract. *Mech. Dev.* **120**, 81–87.
- 779 **Levine, J. H., Simonds, E. F., Bendall, S. C., Davis, K. L., Amir, E. D., Tadmor, M. D., Litvin,  
780 O., Fienberg, H. G., Jager, A., Zunder, E. R., et al.** (2015). Data-Driven Phenotypic  
781 Dissection of AML Reveals Progenitor-like Cells that Correlate with Prognosis. *Cell* **162**,  
782 184–97.
- 783 **Livet, J., Weissman, T. A., Kang, H., Draft, R. W., Lu, J., Bennis, R. A., Sanes, J. R. and  
784 Lichtman, J. W.** (2007). Transgenic strategies for combinatorial expression of  
785 fluorescent proteins in the nervous system. *Nature* **450**, 56–62.
- 786 **Lun, A. T. L., McCarthy, D. J. and Marioni, J. C.** (2016). A step-by-step workflow for low-level  
787 analysis of single-cell RNA-seq data with Bioconductor. *F1000Research* **5**, 2122.
- 788 **Madisen, L., Zwingman, T. A., Sunkin, S. M., Oh, S. W., Zariwala, H. A., Gu, H., Ng, L. L.,  
789 Palmiter, R. D., Hawrylycz, M. J., Jones, A. R., et al.** (2010). A robust and high-  
790 throughput Cre reporting and characterization system for the whole mouse brain. *Nat.*  
791 *Neurosci.* **13**, 133–140.
- 792 **McLin, V. A., Rankin, S. A. and Zorn, A. M.** (2007). Repression of Wnt/beta-catenin signaling  
793 in the anterior endoderm is essential for liver and pancreas development. *Development*  
794 **134**, 2207–17.

- 795 **Medlock, E. S. and Haar, J. L.** (1983). The liver hemopoietic environment: I. Developing  
796 hepatocytes and their role in fetal hemopoiesis. *Anat. Rec.* **207**, 31–41.
- 797 **Micsenyi, A., Tan, X., Sneddon, T., Luo, J.-H., Michalopoulos, G. K. and Monga, S. P. S.**  
798 (2004).  $\beta$ -Catenin is temporally regulated during normal liver development.  
799 *Gastroenterology* **126**, 1134–1146.
- 800 **Miyajima, A., Tanaka, M. and Itoh, T.** (2014). Stem/progenitor cells in liver development,  
801 homeostasis, regeneration, and reprogramming. *Cell Stem Cell* **14**, 561–574.
- 802 **Nierhoff, D., Ogawa, A., Oertel, M., Chen, Y.-Q. and Shafritz, D. A.** (2005). Purification and  
803 characterization of mouse fetal liver epithelial cells with high in vivo repopulation  
804 capacity. *Hepatology* **42**, 130–139.
- 805 **Ober, E. A. and Lemaigre, F. P.** (2018). Development of the liver: Insights into organ and  
806 tissue morphogenesis. *J. Hepatol.* **68**, 1049–1062.
- 807 **Picelli, S., Faridani, O. R., Björklund, Å. K., Winberg, G., Sagasser, S. and Sandberg, R.**  
808 (2014). Full-length RNA-seq from single cells using Smart-seq2. *Nat. Protoc.* **9**, 171–181.
- 809 **Rodríguez-Seguel, E., Mah, N., Naumann, H., Pongrac, I. M., Cerdá-Esteban, N., Fontaine, J.**  
810 **F., Wang, Y., Chen, W., Andrade-Navarro, M. A. and Spagnoli, F. M.** (2013). Mutually  
811 exclusive signaling signatures define the hepatic and pancreatic progenitor cell lineage  
812 divergence. *Genes Dev.* **27**, 1932–1946.
- 813 **Rulands, S., Lescroart, F., Chabab, S., Hindley, C. J., Prior, N., Sznurkowska, M. K., Huch,**  
814 **M., Philpott, A., Blanpain, C. and Simons, B. D.** (2018). Universality of clone dynamics  
815 during tissue development. *Nat. Phys.* **1**.
- 816 **Sasaki, K. and Sonoda, Y.** (2000). Histometrical and three-dimensional analyses of liver  
817 hematopoiesis in the mouse embryo. *Arch Histol Cytol* **63**, 137–146.
- 818 **Scialdone, A., Natarajan, K. N., Saraiva, L. R., Proserpio, V., Teichmann, S. A., Stegle, O.,**  
819 **Marioni, J. C. and Buettner, F.** (2015). Computational assignment of cell-cycle stage  
820 from single-cell transcriptome data. *Methods* **85**, 54–61.
- 821 **Shiojiri, N., Inujima, S., Ishikawa, K., Terada, K. and Mori, M.** (2001). Cell Lineage Analysis  
822 during Liver Development Using the spflash-Heterozygous Mouse. *Lab. Investig.* **81**, 17–  
823 25.
- 824 **Snippert, H. J., van der Flier, L. G., Sato, T., van Es, J. H., van den Born, M., Kroon-**  
825 **Veenboer, C., Barker, N., Klein, A. M., van Rheenen, J., Simons, B. D., et al.** (2010).  
826 Intestinal crypt homeostasis results from neutral competition between symmetrically  
827 dividing Lgr5 stem cells. *Cell* **143**, 134–144.
- 828 **Su, X., Shi, Y., Zou, X., Lu, Z.-N., Xie, G., Yang, J. Y. H., Wu, C.-C., Cui, X.-F., He, K.-Y., Luo,**  
829 **Q., et al.** (2017). Single-cell RNA-Seq analysis reveals dynamic trajectories during  
830 mouse liver development. *BMC Genomics* **18**, 946.
- 831 **Subelj, L. and Bajec, M.** (2011). Unfolding communities in large complex networks:  
832 combining defensive and offensive label propagation for core extraction. *Phys. Rev. E.*  
833 *Stat. Nonlin. Soft Matter Phys.* **83**, 036103.
- 834 **Tan, X., Yuan, Y., Zeng, G., Apte, U., Thompson, M. D., Cieply, B., Stolz, D. B.,**  
835 **Michalopoulos, G. K., Kaestner, K. H. and Monga, S. P. S.** (2008).  $\beta$ -Catenin deletion in  
836 hepatoblasts disrupts hepatic morphogenesis and survival during mouse development.  
837 *Hepatology* **47**, 1667–1679.
- 838 **Tanaka, M., Okabe, M., Suzuki, K., Kamiya, Y., Tsukahara, Y., Saito, S. and Miyajima, A.**  
839 (2009). Mouse hepatoblasts at distinct developmental stages are characterized by  
840 expression of EpCAM and DLK1: Drastic change of EpCAM expression during liver  
841 development. *Mech. Dev.* **126**, 665–676.

- 842 **Trejo, C. L., Luna, G., Dravis, C., Spike, B. T. and Wahl, G. M.** (2017). Lgr5 is a marker for  
843 fetal mammary stem cells, but is not essential for stem cell activity or tumorigenesis.  
844 *npj Breast Cancer* **3**, 16.
- 845 **Ventura, A., Kirsch, D. G., McLaughlin, M. E., Tuveson, D. A., Grimm, J., Lintault, L.,**  
846 **Newman, J., Reczek, E. E., Weissleder, R. and Jacks, T.** (2007). Restoration of p53  
847 function leads to tumour regression in vivo. *Nature* **445**, 661–665.
- 848 **Watanabe, T., Nakagawa, K., Ohata, S., Kitagawa, D., Nishitai, G., Seo, J., Tanemura, S.,**  
849 **Shimizu, N., Kishimoto, H., Wada, T., et al.** (2002). SEK1/MKK4-Mediated SAPK/JNK  
850 Signaling Participates in Embryonic Hepatoblast Proliferation via a Pathway Different  
851 from NF- $\kappa$ B-Induced Anti-Apoptosis. *Dev. Biol.* **250**, 332–347.
- 852 **Wolf, F. A., Hamey, F., Plass, M., Solana, J., Dahlin, J. S., Gottgens, B., Rajewsky, N., Simon,**  
853 **L. and Theis, F. J.** (2018a). Graph abstraction reconciles clustering with trajectory  
854 inference through a topology preserving map of single cells. *bioRxiv* 208819.
- 855 **Wolf, F. A., Angerer, P. and Theis, F. J.** (2018b). SCANPY: large-scale single-cell gene  
856 expression data analysis. *Genome Biol.* **19**, 15.
- 857 **Yanagida, A., Mizuno, N., Yamazaki, Y., Kato-Itoh, M., Umino, A., Sato, H., Ito, K.,**  
858 **Yamaguchi, T., Nakauchi, H. and Kamiya, A.** (2016). Investigation of bipotent  
859 differentiation of hepatoblasts using inducible diphtheria toxin receptor-transgenic  
860 mice. *Hepatol. Res.* **46**, 816–828.
- 861 **Yang, L., Wang, W.-H., Qiu, W.-L., Guo, Z., Bi, E. and Xu, C.-R.** (2017). A single-cell  
862 transcriptomic analysis reveals precise pathways and regulatory mechanisms  
863 underlying hepatoblast differentiation. *Hepatology* **66**, 1387–1401.
- 864 **Zorn** (2008). Liver Development. *StemBook*.
- 865
- 866

867 **Figure legends**

868

869 **Figure 1: Lgr5 expression marks cells with hepatoblast features in the developing liver.**

870 (A-C) Embryos were obtained by breeding *Lgr5-ires-CreERT2<sup>hom</sup>*; *ROSA-TdTomato<sup>hom</sup>*  
871 males with MF1-WT females in order to generate the compound mice *Lgr5-ires-CreERT2<sup>+/+</sup>*;  
872 ; *R26R-TdTomato<sup>+/+</sup>*. Administration of tamoxifen to pregnant females at E9.5 of gestation  
873 leads to activation of Cre in Lgr5+ cells and recombination at the ROSA locus to induce  
874 expression of TdTomato in Lgr5+ cells and their progeny at E9.5-E10. (A) Schematic of  
875 experimental approach. Expression of TdTomato can be detected in E11.5 livers following  
876 induction at E9.5, indicating the presence of Lgr5+ cells in the developing liver at E9.5 (n≥3  
877 independent experiments, n=2 independent litters). Representative image of TdTomato epi-  
878 fluorescence (red) is shown. Nuclei were counterstained with Hoechst (grey). (B)  
879 Representative immunofluorescent staining of TdTomato-expressing cells co-stained with the  
880 hepatoblast marker AFP (green, top panel), endothelial marker VEGFR3 (green, middle top  
881 panel), pan-haematopoietic marker CD45 (green, middle bottom panel) and the proliferative  
882 marker Ki67 (green, bottom panel) cells. (C) Quantification of the immunostainings shown in  
883 B. Note that 100% of the Lgr5+TdTomato+ cells co-express AFP and are negative for the  
884 endothelial and haematopoietic fate markers (n>30, n=2 independent litters). Half of the  
885 TdTomato-expressing cells are proliferative (Ki67+, n>50, n=2 independent litters).

886

887 **Figure 2: Lgr5 is a marker of bona-fide hepatoblasts in vivo.**

888 (A-B) *Lgr5-ires-CreERT2<sup>hom</sup>*; *ROSA-TdTomato<sup>hom</sup>* males were bred with MF1-WT females  
889 in order to generate the compound mice *Lgr5-ires-CreERT2<sup>+/+</sup>*; *R26R-TdTomato<sup>+/+</sup>*. Cre  
890 activity was induced in *Lgr5-ires-CreERT2<sup>+/+</sup>*; *R26R-TdTomato<sup>+/+</sup>* embryos at E9.5 by  
891 injecting pregnant females with tamoxifen (1-2mg) as described in methods. Livers were  
892 collected at the indicated postnatal timepoints and processed for immunofluorescence  
893 analysis to identify the progeny of Lgr5+ E9.5 hepatoblasts in the postnatal liver. (A)  
894 Schematic of experimental approach. (B) Lgr5+ descendants (Tdtomato+ cells, red) include  
895 both hepatocytes and ductal cells (Osteopontin, green). E9.5 Lgr5 progeny are found  
896 distributed along all 3 zones of the liver lobule; the portal triad (PT, zone 1), the central vein  
897 (CV, zone 3) and in the intermediate region (zone 2) at all time points analysed, up to 12  
898 months after birth. In the portal area labelled cells include both hepatocytes and ductal cells,  
899 indicating that the E9.5-E10 induced Lgr5+ cells were bona-fide hepatoblasts. Right panels  
900 represent a magnified area from Zone 1.

901

902 **Figure 3: E9.5 Lgr5+ hepatoblasts are bi-potential.**

903 (A-D) To assess whether a single Lgr5+ hepatoblast is bi-potent, i.e., is able to give rise to  
904 both hepatocytes and ductal cells we generated the compound mouse *Lgr5-ires-*  
905 *CreERT2*; *R26R-Confetti* by breeding the *Lgr5-ires-CreERT2<sup>hom</sup>* with the multicolour  
906 Confetti reporter *R26R-Confetti<sup>hom</sup>* which results in cells labelled in one of four colours  
907 (RFP, YFP, mCFP, nGFP) when induced with 0.16mg/g tamoxifen at E9.5 (see  
908 Supplementary Fig. 2 and Supplementary Dataset 2 for details). In this way we can identify  
909 individual clones to assess the bi-potentiality of individual hepatoblasts. (A) Schematic of  
910 experimental design. The scheme illustrates the two potential outcomes from the experiment;



911 a single *Lgr5*<sup>+</sup> hepatoblast (red circle) is bi-potent and gives rise to both hepatocytes (red  
912 squares) and ductal cells (red triangles) or, alternatively, single *Lgr5*<sup>+</sup> hepatoblasts (blue and  
913 yellow circles) are unipotent and independently give rise to hepatocytes (blue squares) or  
914 ductal cells (yellow triangles). (B-C) Representative images of a P0 *Lgr5-CreERT2*<sup>+/-</sup>;  
915 *R26R-Confetti*<sup>+/-</sup> liver following induction at E9.5. Ductal cells were co-stained with OPN  
916 (blue, white arrows). Nuclei were stained with Hoechst. (B) Low power magnification of a  
917 liver section showing two labelled clones, a red clone and a yellow clone (white arrows). (C)  
918 Magnification showing that the red clone contains both hepatocytes and ductal cells (white  
919 arrows). (D) Pie-charts showing the total number of clones identified (n=70) and the fraction  
920 of these that are located in the portal area (n=26). Note that from the total number of clones  
921 found on the portal area, half of them (n=13) contained both hepatocytes and ductal cells of  
922 the same colour. At the induction dose used, merging of clones of the same colour occurs  
923 with a 1.2% probability (see Supplementary Fig. 2B), which confirms that at least 11 of the  
924 13 bi-potent clones identified arise from a single *Lgr5*<sup>+</sup> cell, demonstrating that indeed *Lgr5*<sup>+</sup>  
925 cells are bi-potent at E9.5. Experiments were performed in n=3 embryos.

926

#### 927 **Figure 4: *Lgr5*<sup>+</sup> embryonic liver cells grow into organoids that generate both ductal** 928 **and hepatocyte fated cells in vitro**

929 (A) Low power magnification of a section of an E10.5 liver showing co-labeling of *Lgr5*-  
930 eGFP<sup>+</sup> cells (green) with the liver progenitor marker *Liv2* (purple). Nuclei were  
931 counterstained with Hoechst. (B-F) Embryonic liver organoids were generated from FACS  
932 sorted *Lgr5*-eGFP positive hepatoblasts obtained from E10.5-E13.5 *Lgr5-EGFP-IRES-*  
933 *creERT2*. Sorted *Liv2*<sup>+</sup>/*CD31*<sup>-</sup>/*CD45*<sup>-</sup>/*Lgr5*-eGFP<sup>+</sup> cells were embedded in Matrigel and  
934 cultured in our optimized duct or hepatocyte (hep) mouse embryo liver medium as described  
935 in methods and supplementary figure S3A,B. (B) Schematic of the experimental approach.  
936 (C-D) Representative image of a mouse embryo liver organoid derived from a single *Lgr5*-  
937 eGFP<sup>+</sup> cell and cultured in cholangiocyte medium (C) or hepatocyte medium (D). Note the  
938 hepatocyte morphology on the organoids grown in hepatocyte medium (D). (E) Expression of  
939 the ductal marker *Krt19* is mainly detected in the ductal organoids grown in ductal medium  
940 and in control adult liver organoids, while the hepatocyte marker Albumin (*Alb*) is only  
941 detected in embryonic cells cultured in hepatocyte medium ('hep'). Graphs represent mean ±  
942 SEM of n≥2 experiments. (F) Immunofluorescence staining for the ductal marker *EpCAM*  
943 and the hepatocyte marker *HNF4* in hepatocyte organoids derived from *Lgr5*-eGFP<sup>+</sup> E11.5  
944 embryonic liver cells. Note that the organoids grow as solid structures with all cells marked  
945 by *HNF4a* while the ductal marker *EpCAM* is virtually not detected. Adult liver organoids  
946 which express high levels of the ductal marker *EpCAM* were used as positive controls for the  
947 staining (see supplementary figure S3C). (G) embryonic cells cultured in 'hep' expressed the  
948 hepatoblast marker *AFP* whilst adult ductal organoids do not. Graphs represent mean ± SEM  
949 of n≥2 experiments.

950

#### 951 **Figure 5: scRNAseq of hepatoblasts reveals heterogeneity in the hepatoblast population.**

952 (A-D) A bulk population of hepatoblasts (*Liv2*<sup>+</sup>) or *Lgr5*-eGFP positive hepatoblasts (*Liv2*<sup>+</sup>  
953 and *Lgr5*-eGFP<sup>+</sup>) from E10.5-E13.5 *Lgr5-EGFP-IRES-creERT2* embryos were obtained by  
954 FACS sorting using the using the combination: *Liv2*<sup>+</sup>/*CD31*<sup>-</sup>/*CD45*<sup>-</sup>/*Lgr5*-eGFP<sup>+</sup> cells as

955 described in Supplementary Fig.3. Both, hepatoblasts cells (Liv2+, bulk hepatoblast pool)  
956 and Lgr5+ hepatoblasts (Liv2+,eGFP+) were processed for scRNAseq analysis using  
957 Smartseq2 protocol. Number of clusters identified and subsequent analysis was performed as  
958 described in methods. (B) Clustering analysis (louvain clustering) of all the cells analysed  
959 (653 sorted cells from E10.5 and E13.5 embryos) classified all the cells into 3 different  
960 clusters: an hepatoblast cluster that exhibits features of hepatoblasts only and that we name  
961 “early hepatoblast cluster” (HB, blue); an hepatoblast cluster with hepatocyte-like features  
962 (‘Hep’, green) and an hepatoblast cluster with cholangiocyte-like features (‘Chol’, orange).  
963 Representative marker genes of each of these three clusters are shown: *Id3* (‘HB’ cluster),  
964 *Ttr*, hepatocyte-like cluster and *Car2*, cholangiocyte-like cluster. Clusters are represented  
965 here using tSNE plots. (C) Diffusion pseudotime analysis of E10.5 and E13.5 cells shows the  
966 early hepatoblast cluster precedes the divergence of hepatocyte-like cells or cholangiocyte-  
967 like cells and has a higher proportion of cells in G2M phase. Left panel, diffusion map  
968 showing DC1 and DC2 components; middle panel, diffusion map where the 3 clusters  
969 identified by louvain clustering are shown; right panel, diffusion map where the cell cycle  
970 phases are shown. Arrows represent developmental trajectory originating from the  
971 proliferating hepatoblast cluster. (D-F) Segregation of the data by expression of Lgr5  
972 transcript (D) or by sorting for Lgr5-eGFP (E) or by time point (F). (D) Lgr5 transcript levels  
973 as determined using single cell sequencing superimposed on the pseudotime analysis of all  
974 the cells (both from the Liv2+ bulk as well as from both time points). (E) Lgr5-eGFP+ cells  
975 based on the FACS data superimposed on the pseudotime analysis of all cells (Liv2+, bulk,  
976 grey; Liv2+Lgr5-eGFP+, green). Note that there are some Lgr5-eGFP+ cells that were sorted  
977 as GFP+ but that have down-regulated the Lgr5-transcript (black arrows), indicating that  
978 these are immediate descendants of the Lgr5+ cells. (F) Diffusion map showing the cells  
979 segregate by time point (blue, E10.5; orange, E13.5). Note that cells sorted at E10.5 are found  
980 in the proliferating hepatoblast cluster, in the cells moving towards the hepatocyte-like  
981 cluster, the hepatocyte-like cluster and cells located in the cholangiocyte-like cluster. At  
982 E13.5 the sorted cells map to the hepatoblast cluster, the cells moving towards the  
983 cholangiocyte-like cluster and the cholangiocyte-like cluster. Sorted cells no longer map to  
984 the hepatocyte cluster, which may indicate that hepatocyte-committed hepatoblasts do not  
985 express the Liv2 epitope at E13.5.

986

### 987 **Figure 6: Lgr5+ hepatoblasts are at the apex of the hepatoblast hierarchy.**

988 (A-E) Pregnant females from both, the Lgr5-Cre (Lgr5-CreERT2) and the ubiquitous Cre  
989 (Rosa-CreERT2, R26RCre) were injected at E9.5 or E13.5 of gestation in order to lineage  
990 trace the early hepatoblast pool. Livers were collected postnatally and assessed for the  
991 contribution of the labelled descendants to the ductal and hepatocyte pools on the postnatal  
992 liver. Clone composition, clone number and clone size were quantified. (A) Representative  
993 images of Confetti-labelled descendants following tamoxifen induction to *Lgr5-CreERT2*;  
994 *R26Rconfetti* mouse at E9.5 and liver collection at P17. Magnified area presents ductal cells  
995 (Osteopontin+, purple) outlined in blue. (B) Schematic displaying the possible outcomes of  
996 labelling proportions following lineage tracing of Lgr5+ cells at E9.5 depending on where  
997 Lgr5+ cells are in the hepatoblast hierarchy (indicated with the blue arrow). If E9.5 Lgr5+  
998 hepatoblasts are at the apex of their hepatoblast hierarchy, it is expected that their

999 contribution to the postnatal liver should represent the homeostatic proportions of  
1000 hepatocytes and ductal cells in the liver (97% vs 3%) as detailed in Blouin et al 1977 and in  
1001 supplementary figure S6D. In the left panel, *Lgr5* (blue arrow) is not at the apex, hence the  
1002 homeostatic proportion is not achieved. On the contrary, in the right panel, *Lgr5*<sup>+</sup> cells are at  
1003 the apex, and that generates the homeostatic proportions. (C) Graph shows that  $3.5\% \pm 0.5\%$   
1004 of labelled epithelial cells following induction from *Lgr5-creERT2* were ductal, which is  
1005 equivalent to the homeostatic percentage of ductal cells in the postnatal liver (none Cre  
1006 driver). In contrast, the percentage of labelled ductal cells using *R26R-CreERT2* at E9.5 was  
1007 significantly higher. At E13.5, lineage tracing from the *Lgr5-CreERT2* allele resulted in no  
1008 labelled ductal cells, whilst induction from the allele at E13.5 gave the same homeostatic  
1009 proportion (mean $\pm$ SEM, each data point represents an individual liver). Analysis of postnatal  
1010 livers was conducted at timepoints P0-P30; later time points were not considered to prevent  
1011 homeostatic cellular turnover confounding the data. \*\*,  $p < 0.01$ ; \*\*\*,  $p < 0.001$ . (D)  
1012 Representative images of Confetti-labelled descendants following tamoxifen induction to  
1013 *R26R-CreERT2;R26Rconfetti* mouse at E9.5 and with liver collection at P14. (E) Cumulative  
1014 distribution of cluster size frequency at P14-P30, comparing labelled clusters derived from  
1015 *Lgr5*<sup>+</sup> cells (*Lgr5-creERT2*) and the bulk population (*R26R-CreERT2*) induced at E9.5  
1016 (mean $\pm$ SEM,  $n \geq 6$ ). Tracing from *Lgr5*<sup>+</sup> cells results in larger clusters than tracing from the  
1017 bulk population (F), suggesting that *Lgr5*<sup>+</sup> cells have greater proliferative potential than the  
1018 bulk population at E9.5 (mean $\pm$ SEM).

1019  
1020

1021 **Supplementary Fig. 1: *Lgr5* labels hepatoblasts from E9.5 to at least E13.5 of liver**  
1022 **development.**

1023 (A-C) *Lgr5-ires-CreERT2*<sup>hom</sup>; *ROSA-TdTomato*<sup>hom</sup> males were bred with MF1-WT females  
1024 in order to generate the compound mice *Lgr5-ires-CreERT2*<sup>+/-</sup>; *R26R-TdTomato*<sup>+/-</sup>. (A) Cre  
1025 activity was induced in *Lgr5-ires-creERT2*<sup>+/-</sup>; *R26R-TdTomato*<sup>+/-</sup> embryos at the indicated  
1026 timepoints and livers collected at P30. Expression of TdTomato was detected in postnatal  
1027 livers only if induction was at E9.5 or later, suggesting that *Lgr5* is expressed in the  
1028 developing liver from E9.5 onwards. Scale bar, 2mm. (B) Lineage tracing from *Lgr5-ires-*  
1029 *creERT2*<sup>+/-</sup>; *R26R-TdTomato*<sup>+/-</sup> embryos induced at E13.5 resulted in only hepatocyte  
1030 progeny. (C) TdTomato tracing was almost never detected in non-tamoxifen induced  
1031 controls. Only in one mouse we detected <100 cells labeled in the liver. In contrast, the  
1032 tracing events in the livers of the tamoxifen induced embryos was clear with several  
1033 thousands of cells labeled. Both the non-induced and induced livers were collected at P14.  
1034 This minute number of labelled cells in the non-induced livers does not affect our  
1035 interpretations in the lineage tracing experiments.

1036

1037 **Supplementary Fig. 2: Lineage tracing from *Lgr5-ires-creERT2;R26R-confetti* and**  
1038 ***R26RCre;R26R-confetti* mice induced at E9.5.**

1039 (A-C) *Lgr5-ires-CreERT2;R26R-Confetti* mice were generated by breeding the *Lgr5-ires-*  
1040 *CreERT2*<sup>hom</sup> with the multicolour Confetti reporter *R26R-Confetti*<sup>hom</sup> and liver tissues  
1041 were collected postnatally. (A) Labeling of the E9.5 embryonic livers of *Lgr5-ires-*  
1042 *CreERT2;R26R-Confetti* mice results in cells labelled in one of four colours (RFP, YFP,

1043 mCFP, nGFP). A representative image of a liver section presenting clones in each of the 4  
1044 colours is shown. Tissue was co-stained with Osteopontin to visualize the ductal cells (OPN,  
1045 magenta). Nuclei were counterstained with Hoechst. a', magnified area showing a red and a  
1046 yellow clone. b', magnified area showing a mCFP clone. c', magnified area showing a nGFP  
1047 clone. Note that no merging of clones is observed. (B) Bicolour-merging events, i.e., clones  
1048 of different colours merging, were rarely detected. Representative image of one of the 2  
1049 merging events observed is shown. Example of a merging event between a CFP and GFP  
1050 clone following induction at E9.5 in *Lgr5-ires-creERT2*<sup>+/-</sup>; *R26R-Confetti*<sup>+/-</sup> embryos. Scale  
1051 bar, 100µm. Graph represents the proportion of bicolour-merging events identified in the 3  
1052 livers analysed (1.2% ± 1.0). Results represent mean ± SEM of the merging events found in  
1053 the n=3 livers analysed (n=1, liver\_1; n=1, liver\_2, n=0, liver\_3). (C-D) Tracing events from  
1054 the R26R-confetti reporter are only in combination with the *Lgr5-CreERT2* (C) or *R26R-*  
1055 *CreERT2* (D) driver are only detected upon tamoxifen administration and never found in non-  
1056 induced mice.

1057

### 1058 **Supplementary figure 3: Lgr5+ hepatoblast sorting strategy.**

1059 *Lgr5-EGFP-IRES-CreERT2*<sup>het</sup> mice were bred and embryos collected at E10.5 of gestation.  
1060 *WT* and *Lgr5-EGFP-IRES-CreERT2*<sup>het</sup> littermate embryos were scored for the presence of  
1061 eGFP in the cranial area. Then, embryos were split by genotype and liver tissues collected  
1062 and processed for cell isolation and single cell dissociation. Cells were stained with the  
1063 hepatoblast marker Liv2, the endothelial marker CD31 and pan-haemopoietic marker CD45 as  
1064 described in methods. Sorted cells were obtained following a sequential gating strategy where  
1065 cells were first gated by FSC vs SSC, then FSC vs Pulse with was used to identify singlets  
1066 and then gated for Liv2+ (bulk hepatoblasts, Liv2+CD31-CD45-) or Liv2+eGFP+ (Lgr5+  
1067 hepatoblasts, (Liv2+CD31-CD45-GFP+ (blue dashed box)).

1068

1069

### 1070 **Supplementary Figure 4: Generation of mouse embryonic liver organoids.**

1071 (A-B) Embryonic liver organoids were generated from bulk hepatoblasts obtained from  
1072 E11.5 *WT* or *Lgr5-EGFP-IRES-creERT2* embryos dissociated as described in methods. (A)  
1073 Isolated cells were embedded in Matrigel and cultured in our mouse liver organoid medium  
1074 (Huch et al., Nature 2013) containing EGF, Noggin, Rspodin1, FGF10, HGF, Nicotinamide  
1075 (left panel) or in the same medium supplemented with 1nM A8301 and 10uM Forskolin  
1076 (optimized duct medium, right panel) as described in methods. This resulted in a evident  
1077 increase in the number and size of organoids formed. (B) Isolated cells embedded in Matrigel  
1078 were also cultured in the recently published hepatocyte (hep) medium that sustains human  
1079 embryonic liver growth in vitro (ref Hu et al., 2018). Removal of FGF7 resulted in a  
1080 significant improvement on the expansion of the organoids. For details refer to methods. (C)  
1081 Immunofluorescence staining for the ductal marker EpCAM and the hepatocyte marker  
1082 HNF4 in adult liver organoids cultured in our standard organoid medium as described in  
1083 (Huch et al., Nature 2013). These served as positive control for the stainings shown in Figure  
1084 4.

1085

### 1086 **Supplementary Figure 5: scRNAseq of hepatoblasts reveals heterogeneity in the**

1087 **hepatoblast population.**

1088 (A) Heatmap displaying the 30 most differentially expressed genes in each cluster as detailed  
1089 in Supplementary Dataset 1. (B) Proportion of cells in G2M phase of the cell cycle in the  
1090 hepatoblast cluster (HB), cholangiocyte-like cluster (Chol) and hepatocyte-like cluster (Hep)  
1091 (mean±95% confidence intervals). (C) Histogram of the distribution of Lgr5 counts shows a  
1092 bimodal distribution. A threshold of 10 counts is used to define a cell as Lgr5+ on the  
1093 transcript level. Using this threshold, we find that 2% of the bulk cells at E10.5 are Lgr5+ at  
1094 the transcript level. (D) Heatmap displaying the differentially expressed genes by time point.  
1095 For extended list see Supplementary Dataset 1\_S2-S6.

1096

1097 **Supplementary Figure 6: Counting of hepatocyte and ductal cell proportions in the**  
1098 **homeostatic postnatal liver.**

1099 (A-D) To count the numbers of hepatocyte and ductal cell homeostatic proportions at the  
1100 different postnatal time points of interest osteopontin (OPN) staining was performed to mark  
1101 the ductal cells and then the proportion of hepatocytes vs ductal cells was counted using an  
1102 automated system. (A) Osteopontin (OPN, purple) marks ductal cells in the P14 liver (nuclei  
1103 are counter stained with Hoechst 33342). (B-C) Immunofluorescent images were segmented  
1104 using ilastik-1.2.2 software in order to isolate cholangiocytes (B) and hepatocytes (C)  
1105 (marked in red). (D) The segmented images were then imported into Fiji in order to count the  
1106 number of cells using the find maxima function on the Hoechst channel. Automated counting  
1107 reveals the homeostatic number of ductal cells as a percentage of epithelial cells is ~3% at all  
1108 3 time points (P0, P14 and P30) analysed. Graph represents the percentage of ductal cells  
1109 within the total epithelial cells counted at the 3 time points analysed (mean ± STDEV). On  
1110 average a 3.4% ± 0.6% of epithelial cells of the mouse liver are ductal, this proportion does  
1111 not change over postnatal days P0 - P30 (mean ± STDEV). Table indicates the total number  
1112 of cells counted and the % of ductal cells within these at each of the 3 time points analysed.

1113

1114 **Supplementary Figure 7: Lgr5\_KO does not exhibit an apparent liver phenotype.**

1115 Quantification of the ratio liver/body weight of the different genotypes for the Lgr5EGFP  
1116 mouse model. Note that breeding this mouse as homozygous results in severe lethality at  
1117 E17.5. Ratio liver/body weight of Lgr5EGFP WT, Het and KO mice (n=31, 5 different  
1118 litters) at E13.5. No significant differences were found following analysis of all embryos or  
1119 following sub-classification of genotypes according to sex (data not shown).

1120

1121 **Supplementary video S1: Confocal Z-stack video of a bi-potent Lgr5 clone derived from**  
1122 **an *Lgr5-ires-creERT2;R26R-confetti* mouse embryo injected at E9.5**

1123

1124 **Supplementary dataset 1: scRNAseq gene lists**

1125

1126 **Supplementary dataset 2: Tracing counts used for the analysis**

1127

1128 **Supplementary dataset 3: List of material and reagents used in the manuscript**

1129

## Figure 1: *Lgr5* expression marks cells with hepatoblast features in the developing liver.

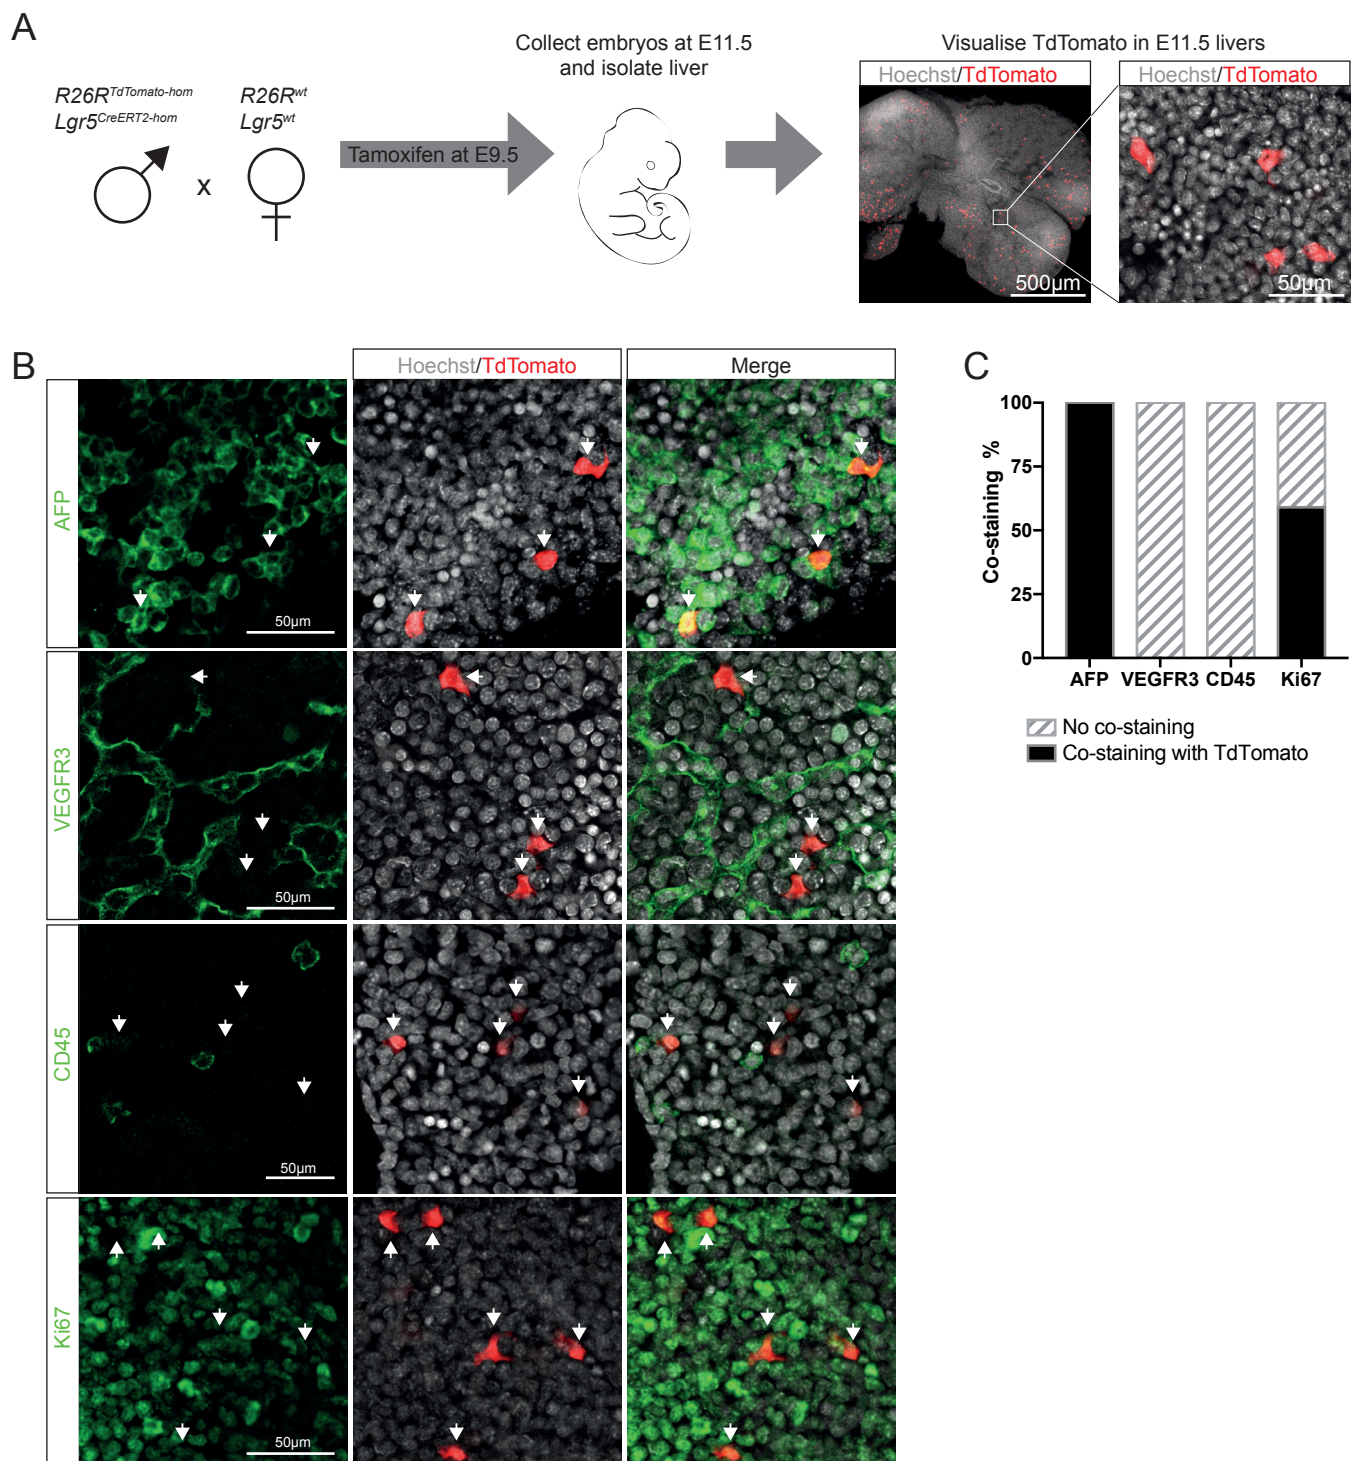

### Figure 1: *Lgr5* expression marks cells with hepatoblast features in the developing liver.

(A-C) Embryos were obtained by breeding *Lgr5-ires-CreERT2<sup>hom</sup>*; *Rosa-TdTomato<sup>hom</sup>* males with MF1-WT females in order to generate the compound mice *Lgr5-ires-CreERT2<sup>+/-</sup>*; *R26R-TdTomato<sup>+/-</sup>*. Administration of tamoxifen to pregnant females at E9.5 of gestation leads to activation of Cre in *Lgr5*<sup>+</sup> cells and recombination at the ROSA locus to induce expression of TdTomato in *Lgr5*<sup>+</sup> cells and their progeny at E9.5-E10. (A) Schematic of experimental approach. Expression of TdTomato can be detected in E11.5 livers following induction at E9.5, indicating the presence of *Lgr5*<sup>+</sup> cells in the developing liver at E9.5 (n≥3 independent experiments, n=2 independent litters). Representative image of TdTomato epi-fluorescence (red) is shown. Nuclei were counterstained with Hoechst (grey). (B) Representative immunofluorescent staining of TdTomato-expressing cells co-stained with the hepatoblast marker AFP (green, top panel), endothelial marker VEGFR3 (green, middle top panel), pan-haematopoietic marker CD45 (green, middle bottom panel) and the proliferative marker Ki67 (green, bottom panel). (C) Quantification of the immunostainings shown in B. Note that 100% of the *Lgr5*<sup>+</sup>TdTomato<sup>+</sup> cells co-express AFP and are negative for the endothelial and haematopoietic fate markers (n>30, n=2 independent litters). Half of the TdTomato-expressing cells are proliferative (Ki67<sup>+</sup>, n>50, n=2 independent litters).

**Figure 2: *Lgr5* is a marker of *bona fide* hepatoblasts *in vivo*.**

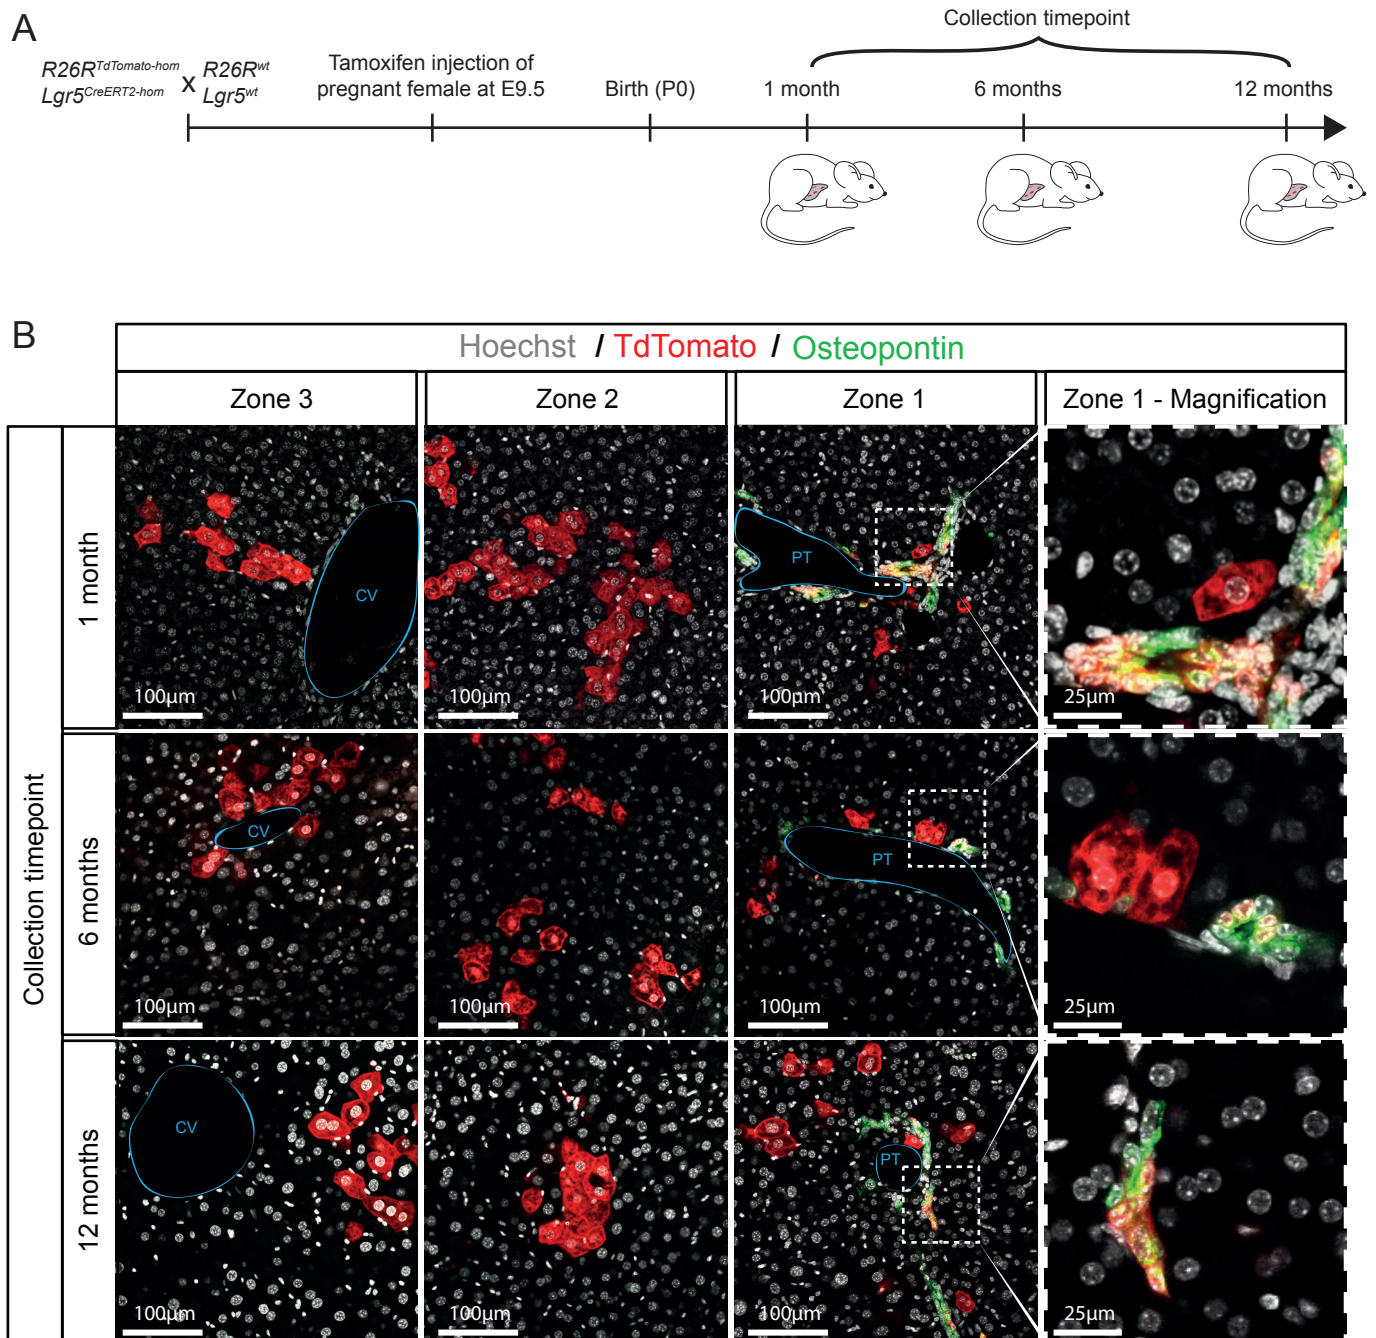

**Figure 2: *Lgr5* is a marker of *bona fide* hepatoblasts *in vivo*.**

(A-B) *Lgr5-ires-CreERT2<sup>hom</sup>*; *ROSA-TdTomato<sup>hom</sup>* males were bred with MF1-WT females in order to generate the compound mice *Lgr5-ires-CreERT2<sup>+/-</sup>*; *R26R-TdTomato<sup>+/-</sup>*. Cre activity was induced in *Lgr5-ires-CreERT2<sup>+/-</sup>*; *R26R-TdTomato<sup>+/-</sup>* embryos at E9.5 by injecting pregnant females with tamoxifen (1-2mg) as described in methods. Livers were collected at the indicated postnatal timepoints and processed for immunofluorescence analysis to identify the progeny of *Lgr5<sup>+</sup>* E9.5 hepatoblasts in the postnatal liver. (A) Schematic of experimental approach. (B) *Lgr5<sup>+</sup>* descendants (Tdtomato<sup>+</sup> cells, red) include both hepatocytes and ductal cells (Osteopontin, green). E9.5 *Lgr5* progeny are found distributed along all 3 zones of the liver lobule; the portal triad (PT, zone 1), the central vein (CV, zone 3) and in the intermediate region (zone 2) at all time points analysed, up to 12 months after birth. In the portal area labelled cells include both hepatocytes and ductal cells, indicating that the E9.5-E10 induced *Lgr5<sup>+</sup>*-cells were *bona-fide* hepatoblasts. Right panels represent a magnified area from Zone 1.

### Figure 3: E9.5 *Lgr5*<sup>+</sup> hepatoblasts are bipotential

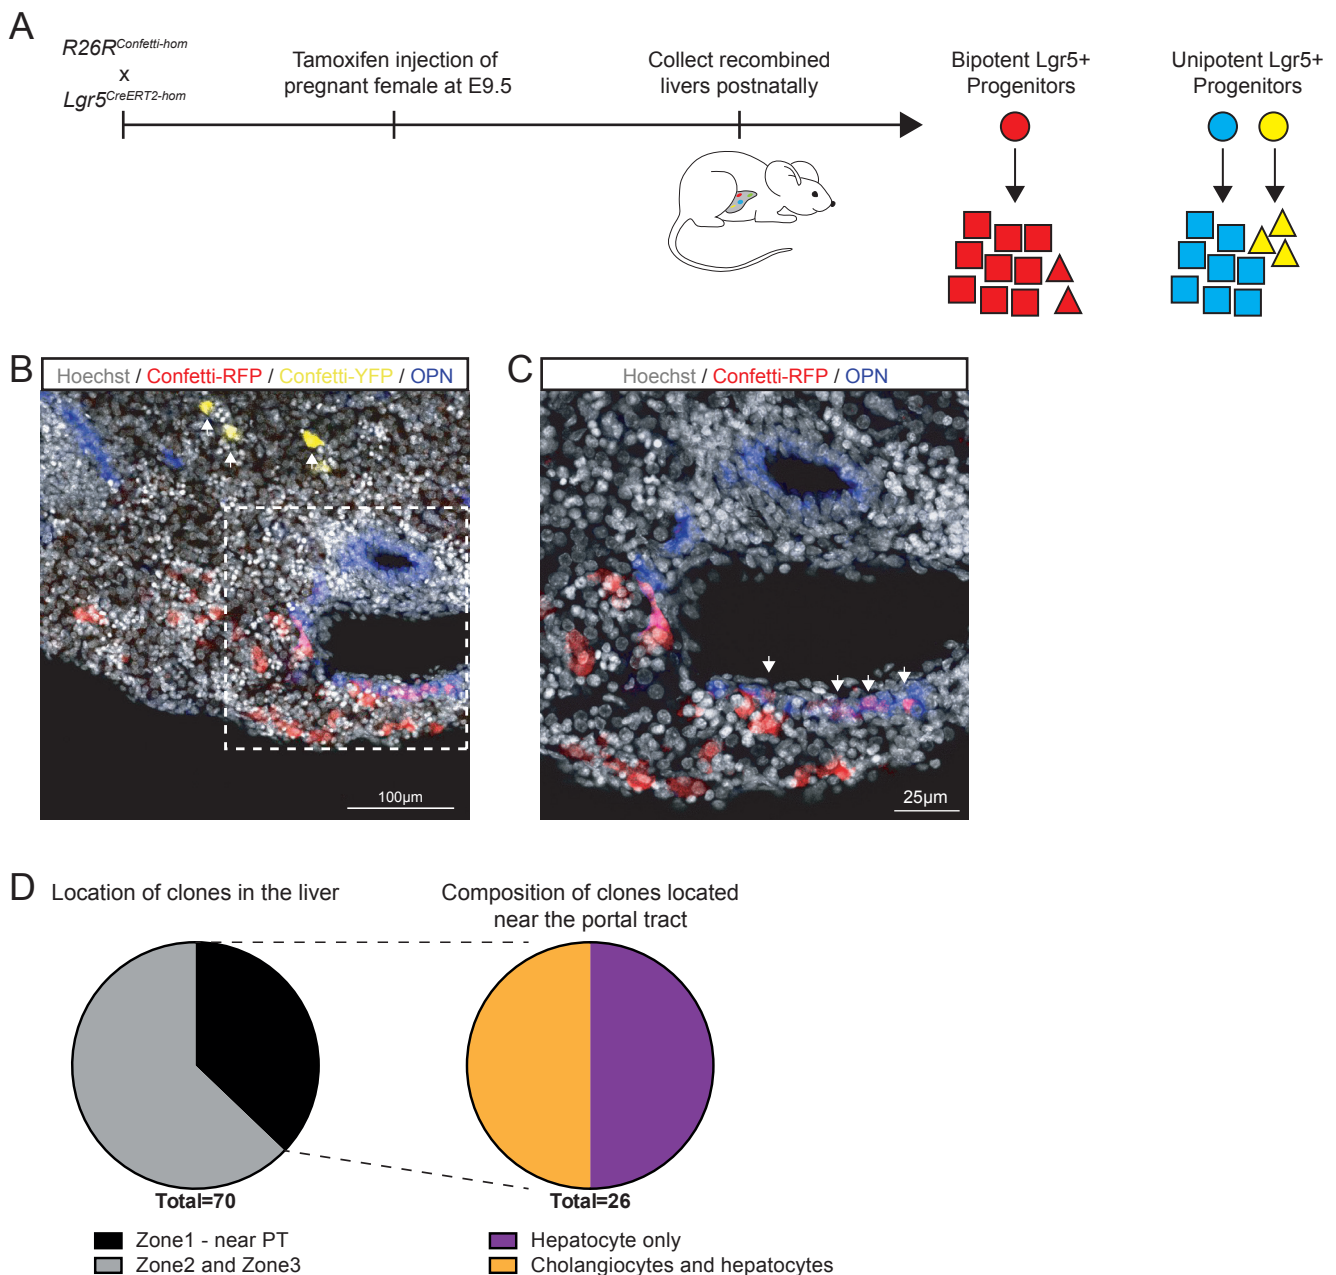

#### Figure 3: E9.5 *Lgr5*<sup>+</sup> hepatoblasts are bi-potential.

(A-D) To assess whether a single *Lgr5*<sup>+</sup> hepatoblast is bi-potent, *i.e.*, is able to give rise to both hepatocytes and ductal cells we generated the compound mouse *Lgr5-ires-CreERT2;R26R-Confetti* by breeding the *Lgr5-ires-CreERT2<sup>hom</sup>* with the multicolour Confetti reporter *R26R-Confetti<sup>hom</sup>* which results in cells labelled in one of four colours (RFP, YFP, mCFP, nGFP) when induced with 0.16mg/g tamoxifen at E9.5 (see Supplementary Fig. 2 and Supplementary Dataset 2 for details). In this way we can identify individual clones to assess the bi-potentiality of individual hepatoblasts. (A) Schematic of experimental design. The scheme illustrates the two potential outcomes from the experiment; a single *Lgr5*<sup>+</sup> hepatoblast (red circle) is bi-potent and gives rise to both hepatocytes (red squares) and ductal cells (red triangles) or, alternatively, single *Lgr5*<sup>+</sup> hepatoblasts (blue and yellow circles) are unipotent and independently give rise to hepatocytes (blue squares) or ductal cells (yellow triangles). (B-C) Representative images of a P0 *Lgr5-CreERT2<sup>+/+</sup>; R26R-Confetti<sup>+/+</sup>* liver following induction at E9.5. Ductal cells were co-stained with OPN (blue, white arrows). Nuclei were stained with Hoechst. (B) Low power magnification of a liver section showing two labelled clones, a red clone and a yellow clone (white arrows). (C) Magnification showing that the red clone contains both hepatocytes and ductal cells (white arrows). (D) Pie-charts showing the total number of clones identified ( $n=70$ ) and the fraction of these that are located in the portal area ( $n=26$ ). Note that from the total number of clones found on the portal area, half of them ( $n=13$ ) contained both hepatocytes and ductal cells of the same colour. At the induction dose used, merging of clones of the same colour occurs with a 1.2% probability (see Supplementary Fig. 2B), which confirms that at least 11 of the 13 bi-potent clones identified arise from a single *Lgr5*<sup>+</sup> cell, demonstrating that indeed *Lgr5*<sup>+</sup> cells are bi-potent at E9.5. Experiments were performed in  $n=3$  embryos.



## Figure 4: *Lgr5*<sup>+</sup> embryonic liver cells grow into organoids that generate both ductal and hepatocyte fated cells *in vitro*

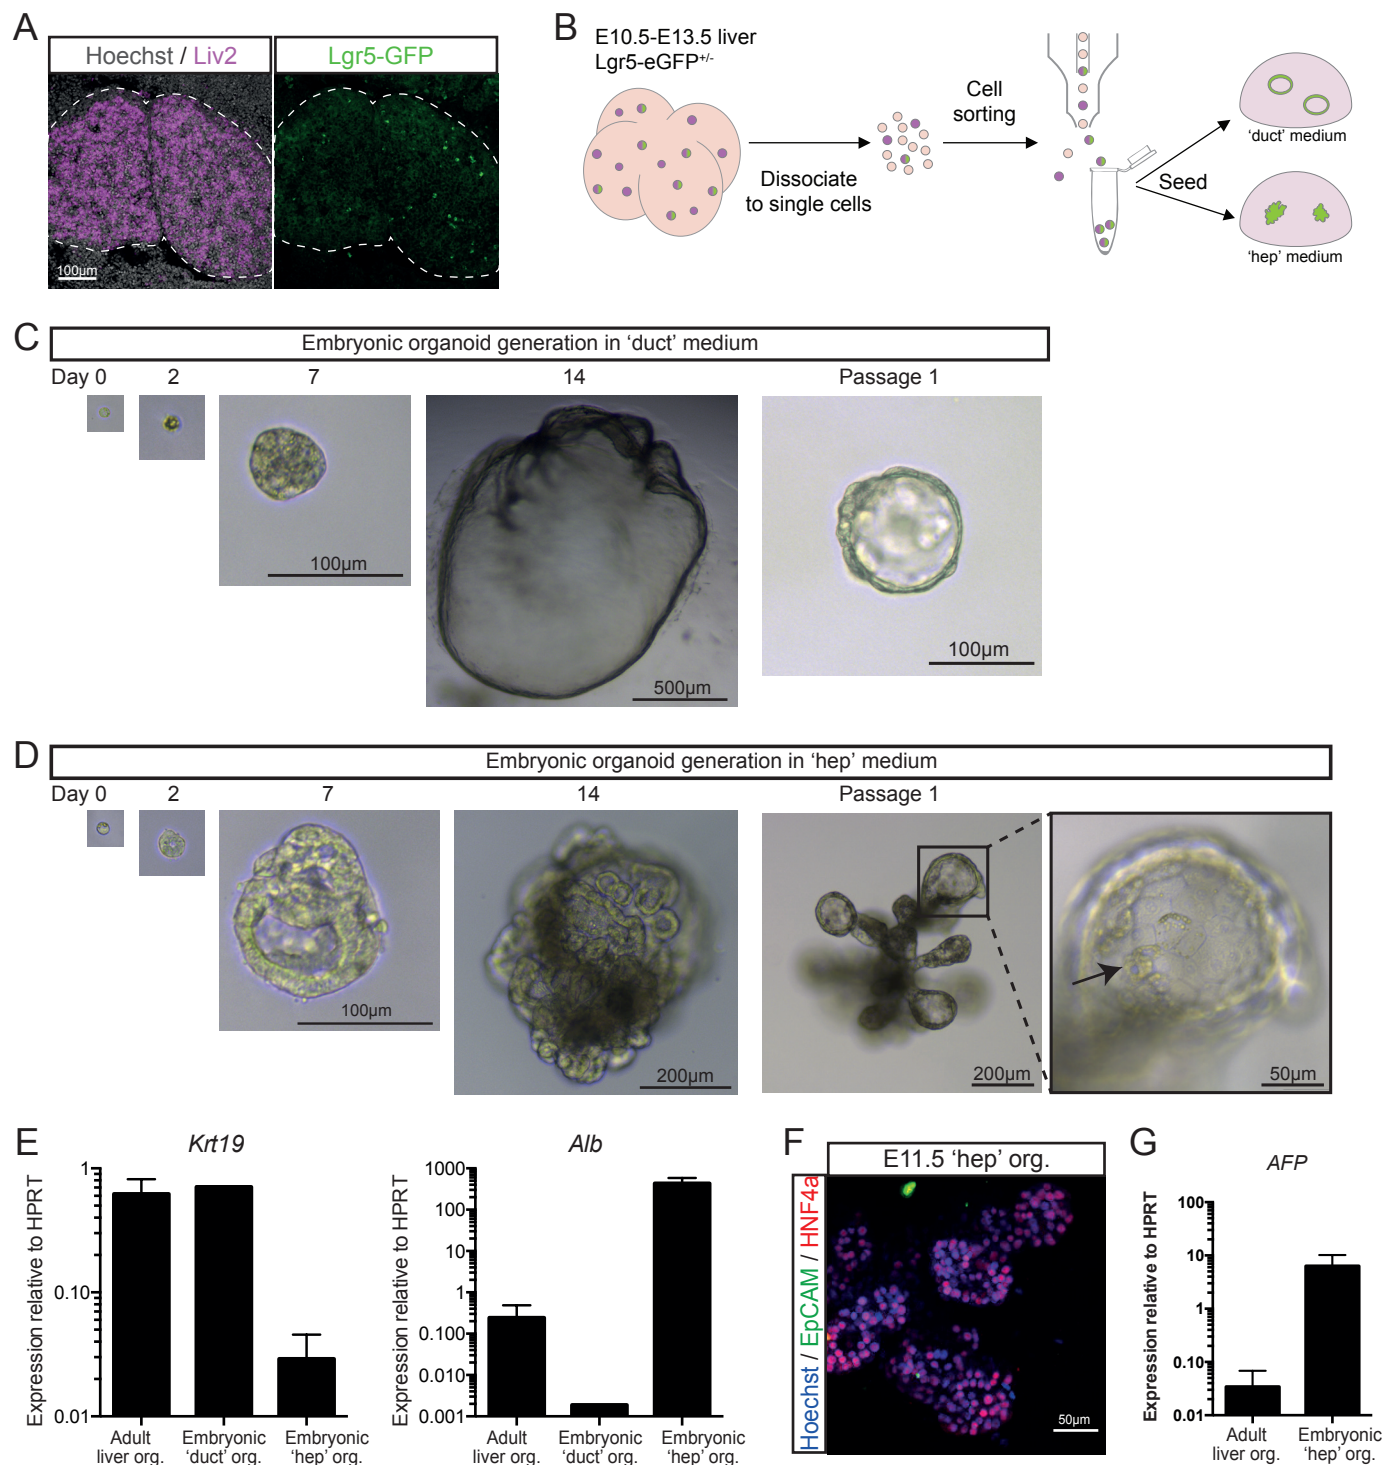

**Figure 4: *Lgr5*<sup>+</sup> embryonic liver cells grow into organoids that generate both ductal and hepatocyte fated cells *in vitro***  
 (A) Low power magnification of a section of an E10.5 liver showing co-labeling of *Lgr5*-eGFP<sup>+</sup> cells (green) with the liver progenitor marker *Liv2* (purple). Nuclei were counterstained with Hoechst. (B-F) Embryonic liver organoids were generated from FACS sorted *Lgr5*-eGFP positive hepatoblasts obtained from E10.5-E13.5 *Lgr5*-EGFP-*IRE5*-*creERT2* embryos. Sorted *Liv2*<sup>+</sup>/*CD31*<sup>-</sup>/*CD45*<sup>-</sup>/*Lgr5*-eGFP<sup>+</sup> cells (for details see Supplementary Fig.3) were embedded in Matrigel and cultured in our optimized duct or hepatocyte (hep) mouse embryo liver medium as described in methods and Supplementary Figure 4A-B. (B) Schematic of the experimental approach. (C-D) Representative image of a mouse embryo liver organoid derived from a single *Lgr5*-eGFP<sup>+</sup> cell and cultured in cholangiocyte medium (C) or hepatocyte medium (D). Note the hepatocyte morphology of the cells on the organoids grown in hepatocyte medium (D). (E) Expression of the ductal marker *Krt19* is mainly detected in the ductal organoids grown in ductal medium and in control adult liver organoids, while the hepatocyte marker Albumin (*Alb*) is only detected in embryonic cells cultured in hepatocyte medium ('hep'). Graphs represent mean  $\pm$  SEM of  $n \geq 2$  experiments. (F) Immunofluorescence staining for the ductal marker EpCAM and the hepatocyte marker HNF4a in hepatocyte organoids derived from *Lgr5*-eGFP<sup>+</sup> E11.5 embryonic liver cells. Note that the organoids grow as solid structures with all cells marked by HNF4a while the ductal marker EpCAM is virtually not detected. Adult liver organoids which express high levels of the ductal marker EpCAM were used as positive controls for the staining (see supplementary figure S4C). (G) Embryonic cells cultured in 'hep' expressed the hepatoblast marker AFP whilst adult ductal organoids do not. Graphs represent mean  $\pm$  SEM of  $n \geq 2$  experiments.

### Figure 5: scRNAseq of hepatoblasts reveals heterogeneity in the hepatoblast population.

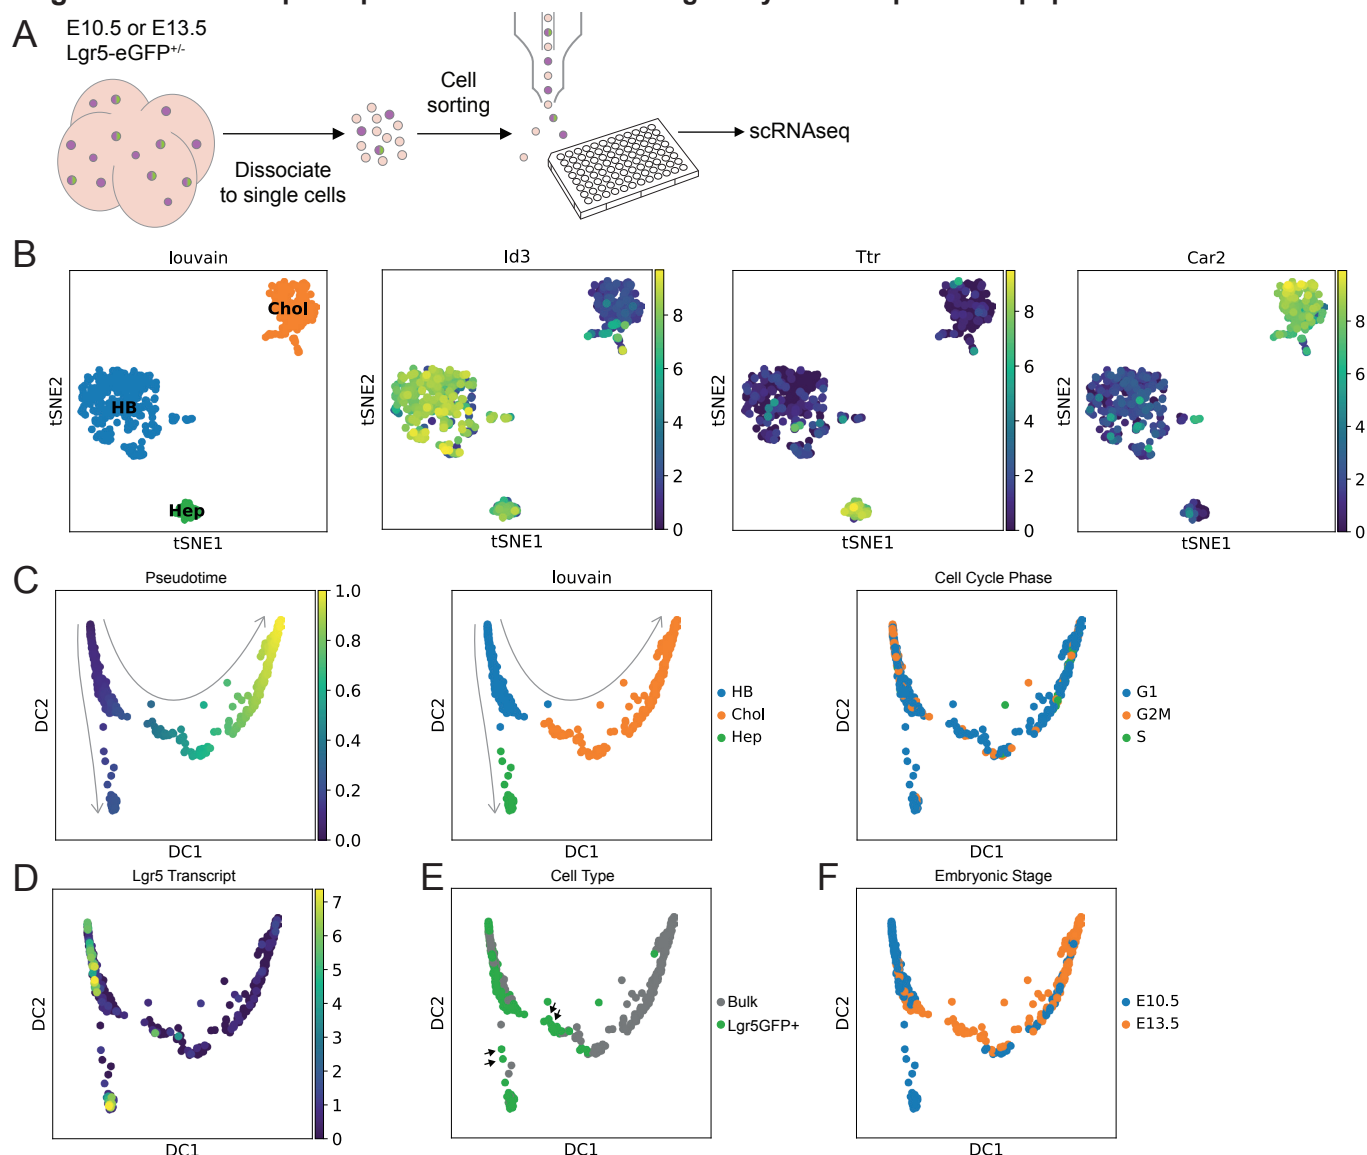

### Figure 5: scRNAseq of hepatoblasts reveals heterogeneity in the hepatoblast population.

(A-D) A bulk population of hepatoblasts (Liv2+) or Lgr5-eGFP positive hepatoblasts (Liv2+ and Lgr5-eGFP+) from E10.5-E13.5 *Lgr5-EGFP-IRES-creERT2* embryos were obtained by FACS sorting using the combination: Liv2+/CD31-/CD45-/Lgr5-eGFP+ cells as described in Supplementary Fig.3. Both, hepatoblasts cells (Liv2+, bulk hepatoblast pool) and Lgr5+ hepatoblasts (Liv2+,eGFP+) were processed for scRNAseq analysis using Smartseq2 protocol. Number of clusters identified and subsequent analysis was performed as described in methods. (B) Clustering analysis (louvain clustering) of all the cells analysed (653 sorted cells from E10.5 and E13.5 embryos) classified all the cells into 3 different clusters: an hepatoblast cluster that exhibits features of hepatoblasts only and that we name “early hepatoblast cluster” (HB, blue); an hepatoblast cluster with hepatocyte-like features (‘Hep’, green) and an hepatoblast cluster with cholangiocyte-like features (‘Chol’, orange). Representative marker genes of each of these three clusters are shown: *Id3* (‘HB’ cluster), *Ttr*, hepatocyte-like cluster and *Car2*, cholangiocyte-like cluster. Clusters are represented here using tSNE plots. (C) Diffusion pseudotime analysis of E10.5 and E13.5 cells shows the early hepatoblast cluster precedes the divergence of hepatocyte-like cells or cholangiocyte-like cells and has a higher proportion of cells in G2M phase. Left panel, diffusion map showing DC1 and DC2 components; middle panel, diffusion map where the 3 clusters identified by louvain clustering are shown; right panel, diffusion map where the cell cycle phases are shown. Arrows represent developmental trajectory originating from the proliferating hepatoblast cluster. (D-F) Segregation of the data by expression of *Lgr5* transcript (D) or by sorting for Lgr5-eGFP (E) or by time point (F). (D) *Lgr5* transcript levels as determined using single cell sequencing superimposed on the pseudotime analysis of all the cells (both from the Liv2+ bulk as well as from both time points). (E) Lgr5-eGFP+ cells based on the FACS data superimposed on the pseudotime analysis of all cells (Liv2+, bulk, grey; Liv2+Lgr5-eGFP+, green). Note that there are some Lgr5-eGFP+ cells that were sorted as GFP+ but that have down-regulated the *Lgr5*-transcript (black arrows), indicating that these are immediate descendants of the Lgr5+ cells. (F) Diffusion map showing the cells segregate by time point (blue, E10.5; orange, E13.5). Note that cells sorted at E10.5 are found in the proliferating hepatoblast cluster, in the cells moving towards the hepatocyte-like cluster, the hepatocyte-like cluster and cells located in the cholangiocyte-like cluster. At E13.5 the sorted cells map to the hepatoblast cluster, the cells moving towards the cholangiocyte-like cluster and the cholangiocyte-like cluster. Sorted cells no longer map to the hepatocyte cluster, which may indicate that hepatocyte-committed hepatoblasts do not express the Liv2 epitope at E13.5.

## Figure 6: Lgr5<sup>+</sup> hepatoblasts are at the apex of the hepatoblast hierarchy.

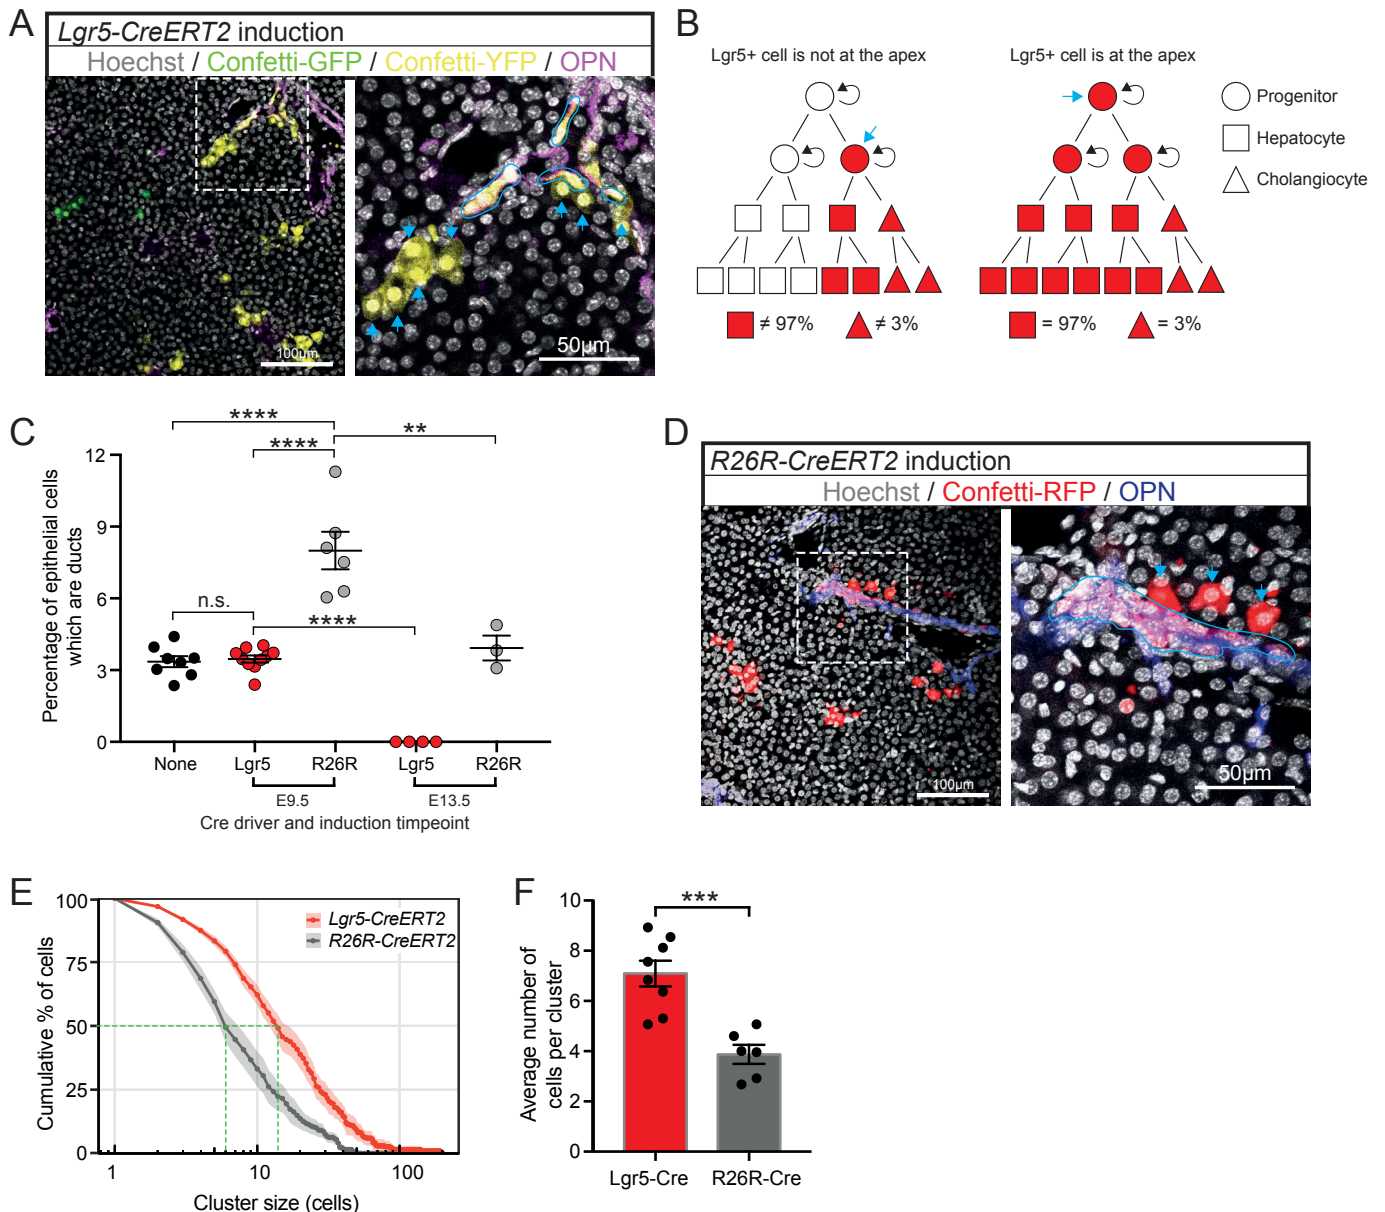

### Figure 6: Lgr5<sup>+</sup> hepatoblasts are at the apex of the hepatoblast hierarchy.

(A-E) Pregnant females from both, the *Lgr5-Cre* (*Lgr5-CreERT2*) and the ubiquitous *Cre* (*Rosa-CreERT2*, *R26Rcre*) were injected at E9.5 or E13.5 of gestation in order to lineage trace the early hepatoblast pool. Livers were collected postnatally and assessed for the contribution of the labelled descendants to the ductal and hepatocyte pools on the postnatal liver. Clone composition, clone number and clone size were quantified. (A) Representative images of Confetti-labelled descendants following tamoxifen induction to *Lgr5-CreERT2*; *R26Rconfetti* mouse at E9.5 and liver collection at P17. Magnified area presents ductal cells (Osteopontin<sup>+</sup>, purple) outlined in blue. (B) Schematic displaying the possible outcomes of labelling proportions following lineage tracing of *Lgr5*<sup>+</sup> cells at E9.5 depending on where *Lgr5*<sup>+</sup> cells are in the hepatoblast hierarchy (indicated with the blue arrow). If E9.5 *Lgr5*<sup>+</sup> hepatoblasts are at the apex of their hepatoblast hierarchy, it is expected that their contribution to the postnatal liver should represent the homeostatic proportions of hepatocytes and ductal cells in the liver (97% vs 3%) as detailed in Blouin et al 1977 and in supplementary figure S6D. In the left panel, *Lgr5* (blue arrow) is not at the apex, hence the homeostatic proportion is not achieved. On the contrary, in the right panel, *Lgr5*<sup>+</sup> cells are at the apex, and that generates the homeostatic proportions. (C) Graph shows that 3.5% ± 0.5% of labelled epithelial cells following induction from *Lgr5-creERT2* were ductal, which is equivalent to the homeostatic percentage of ductal cells in the postnatal liver (none *Cre* driver). In contrast, the percentage of labelled ductal cells using *R26R-CreERT2* at E9.5 was significantly higher. At E13.5, lineage tracing from the *Lgr5-CreERT2* allele resulted in no labelled ductal cells, whilst induction from the *R26R-CreERT2* allele at E13.5 gave the same homeostatic proportion (mean±SEM, each data point represents an individual liver). Analysis of postnatal livers was conducted at timepoints P0-P30; later time points were not considered to prevent homeostatic cellular turnover confounding the data. \*\*, p<0.01; \*\*\*, p<0.001. (D) Representative images of Confetti-labelled descendants following tamoxifen induction to *R26R-CreERT2*; *R26Rconfetti* mouse at E9.5 and with liver collection at P14. (E) Cumulative distribution of cluster size frequency at P14-P30, comparing labelled clusters derived from *Lgr5*<sup>+</sup> cells (*Lgr5-creERT2*) and the bulk population (*R26R-CreERT2*) induced at E9.5 (mean±SEM, n≥6). Tracing from *Lgr5*<sup>+</sup> cells results in larger clusters than tracing from the bulk population (F), suggesting that *Lgr5*<sup>+</sup> cells have greater proliferative potential than the bulk population at E9.5 (mean±SEM).

SUPPLEMENTARY FIG. 1

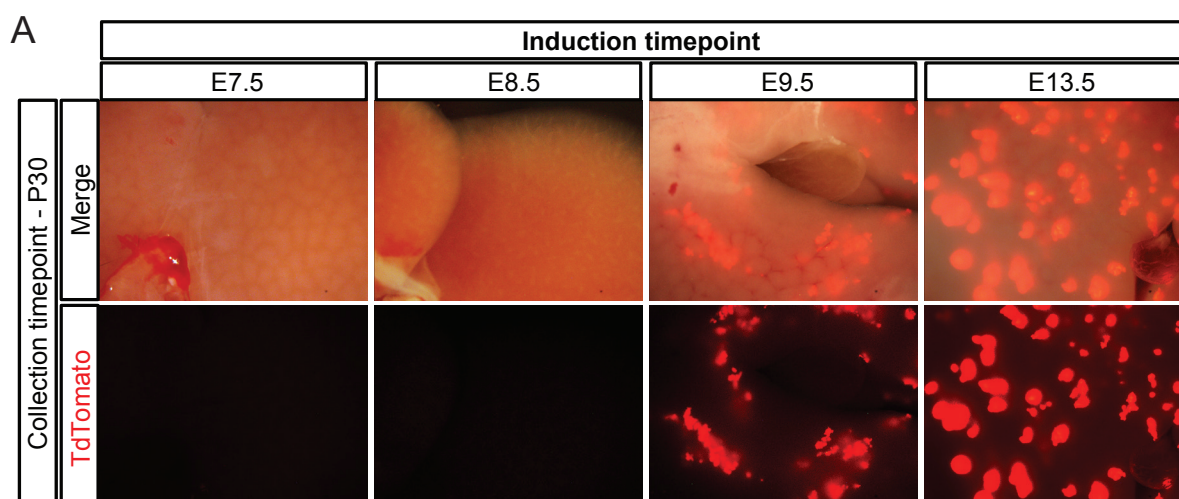

**B** E13.5 induced *Lgr5-CreERT2/R26R-TdTomato* lineage tracing  
Hoechst / TdTomato / OPN

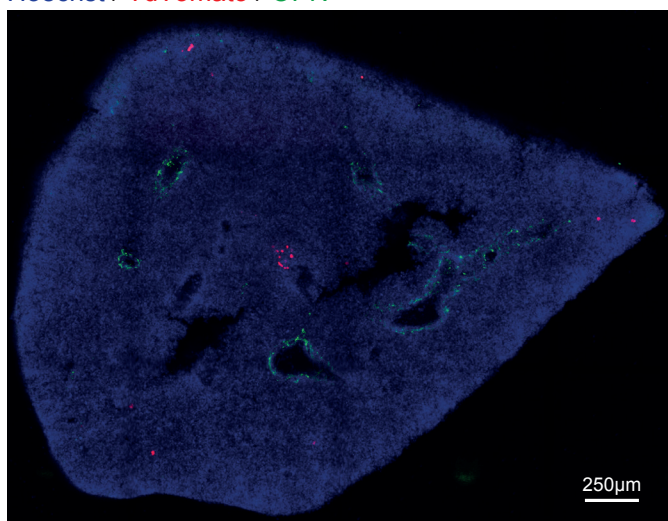

**C** *Lgr5-CreERT2/R26R-Tdtomato*

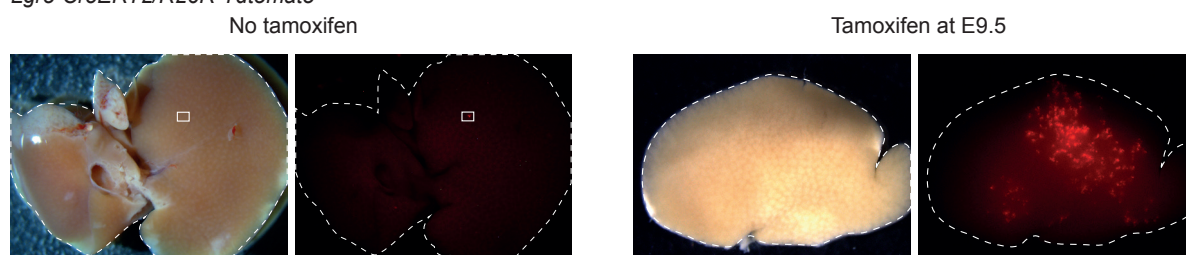

**Supplementary Fig. 1: *Lgr5* labels hepatoblasts from E9.5 to at least E13.5 of liver development.** (A-C) *Lgr5-ires-CreERT2<sup>hom</sup>; ROSA-TdTomato<sup>hom</sup>* males were bred with MF1-WT females in order to generate the compound mice *Lgr5-ires-CreERT2<sup>+/-</sup>;R26R-TdTomato<sup>+/-</sup>*. (A) Cre activity was induced in *Lgr5-ires-creERT2<sup>+/-</sup>;R26R-TdTomato<sup>+/-</sup>* embryos at the indicated timepoints and livers collected at P30. Expression of TdTomato was detected in postnatal livers only if induction was at E9.5 or later, suggesting that *Lgr5* is expressed in the developing liver from E9.5 onwards. Scale bar, 2mm. (B) Lineage tracing from *Lgr5-ires-creERT2<sup>+/-</sup>; R26R-TdTomato<sup>+/-</sup>* embryos induced at E13.5 resulted in only hepatocyte progeny. (C) TdTomato tracing was almost never detected in non-tamoxifen induced controls. Only in one mouse we detected <100 cells labeled in the liver. In contrast, the tracing events in the livers of the tamoxifen induced embryos was clear with several thousands of cells labeled. Both the non-induced and induced livers were collected at P14. This minute number of labelled cells in the non-induced livers does not affect our interpretations in the lineage tracing experiments.

## SUPPLEMENTARY Fig. 2

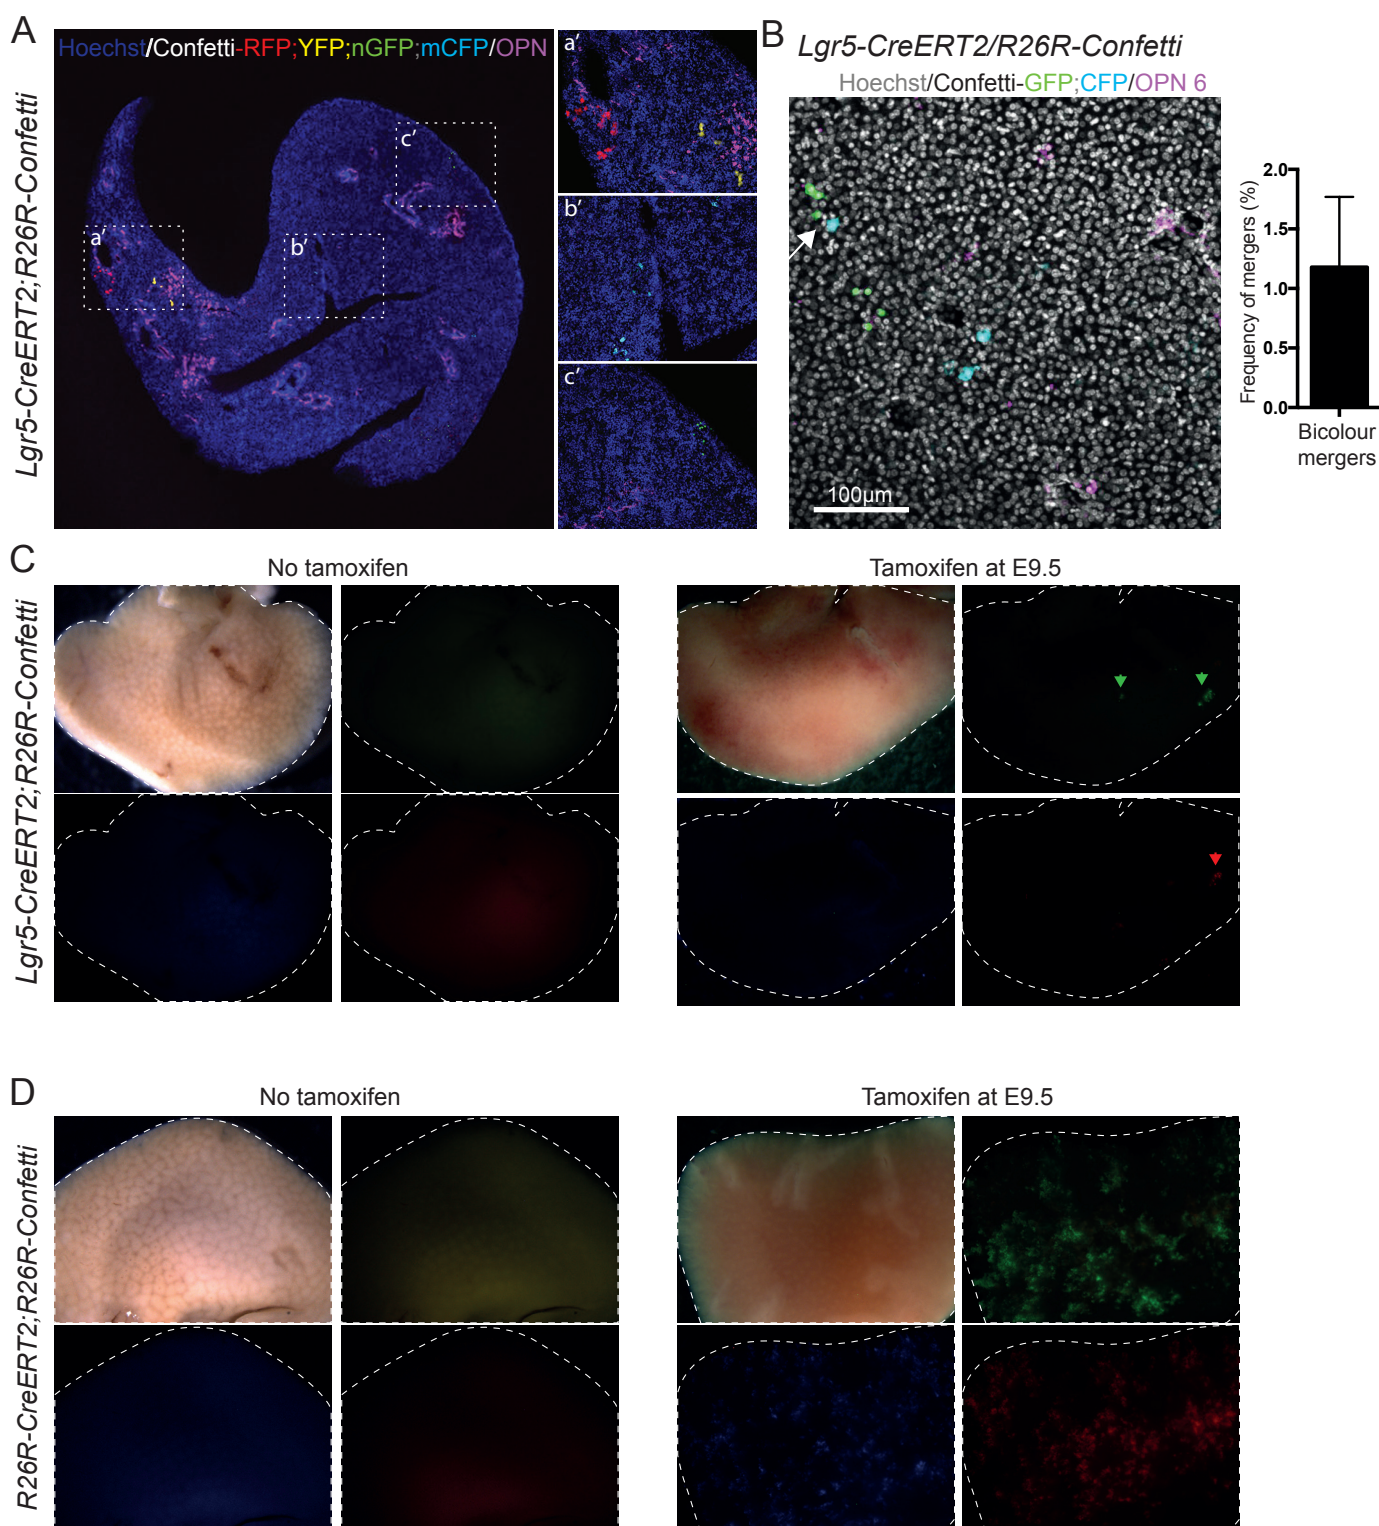

**Supplementary Fig. 2: Lineage tracing from *Lgr5-ires-creERT2;R26R-confetti* and *R26RCre;R26R-confetti* mice induced at E9.5.** (A-C) *Lgr5-ires-CreERT2;R26R-Confetti* mice were generated by breeding the *Lgr5-ires-CreERT2<sup>hom</sup>* with the multicolour Confetti reporter *R26R-Confetti<sup>hom</sup>* and liver tissues were collected postnatally. (A) Labeling of the E9.5 embryonic livers of *Lgr5-ires-CreERT2;R26R-Confetti* mice results in cells labelled in one of four colours (RFP, YFP, mCFP, nGFP). A representative image of a liver section presenting clones in each of the 4 colours is shown. Tissue was co-stained with Osteopontin to visualize the ductal cells (OPN, magenta). Nuclei were counterstained with Hoechst. a', magnified area showing a red and a yellow clone. b', magnified area showing a mCFP clone. c', magnified area showing a nGFP clone. Note that no merging of clones is observed. (B) Bicolour-merging events, i.e., clones of different colours merging, were rarely detected. Representative image of one of the 2 merging events observed is shown. Example of a merging event between a CFP and GFP clone following induction at E9.5 in *Lgr5-ires-creERT2<sup>+/+</sup>;R26R-Confetti<sup>+/+</sup>* embryos. Scale bar, 100µm. Graph represents the proportion of bicolour-merging events identified in the 3 livers analysed (1.2% ± 1.0). Results represent mean ± SEM of the merging events found in the n=3 livers analysed (n=1, liver\_1; n=1, liver\_2, n=0, liver\_3). (C-D) Tracing events from the R26R-confetti reporter are only in combination with the *Lgr5-CreERT2* (C) or *R26R-CreERT2* (D) driver are only detected upon tamoxifen administration and never found in non-induced mice.

## SUPPLEMENTARY FIG. 3

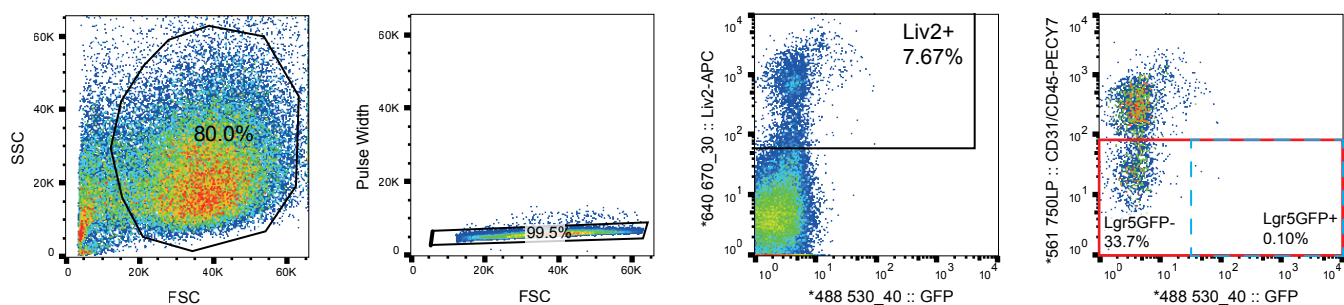

**Supplementary Fig. 3: Lgr5+ hepatoblast sorting strategy.** *Lgr5-EGFP-IRES-CreERT2<sup>het</sup>* mice were bred and embryos collected at E10.5 of gestation. *WT* and *Lgr5-EGFP-IRES-CreERT2<sup>het</sup>* littermate embryos were scored for the presence of eGFP in the cranial area. Then, embryos were split by genotype and liver tissues collected and processed for cell isolation and single cell dissociation. Cells were stained with the hepatoblast marker Liv2, the endothelial marker CD31 and pan-haemopoietic marker CD45 as described in methods. Sorted cells were obtained following a sequential gating strategy where cells were first gated by FSC vs SSC, then FSC vs Pulse width was used to identify singlets and then gated for Liv2+ (bulk hepatoblasts, Liv2<sup>+</sup>CD31<sup>-</sup>CD45<sup>-</sup>) or Liv2+eGFP+ (Lgr5+ hepatoblasts, Liv2<sup>+</sup>CD31<sup>-</sup>CD45<sup>-</sup>GFP<sup>+</sup> (blue dashed box)).

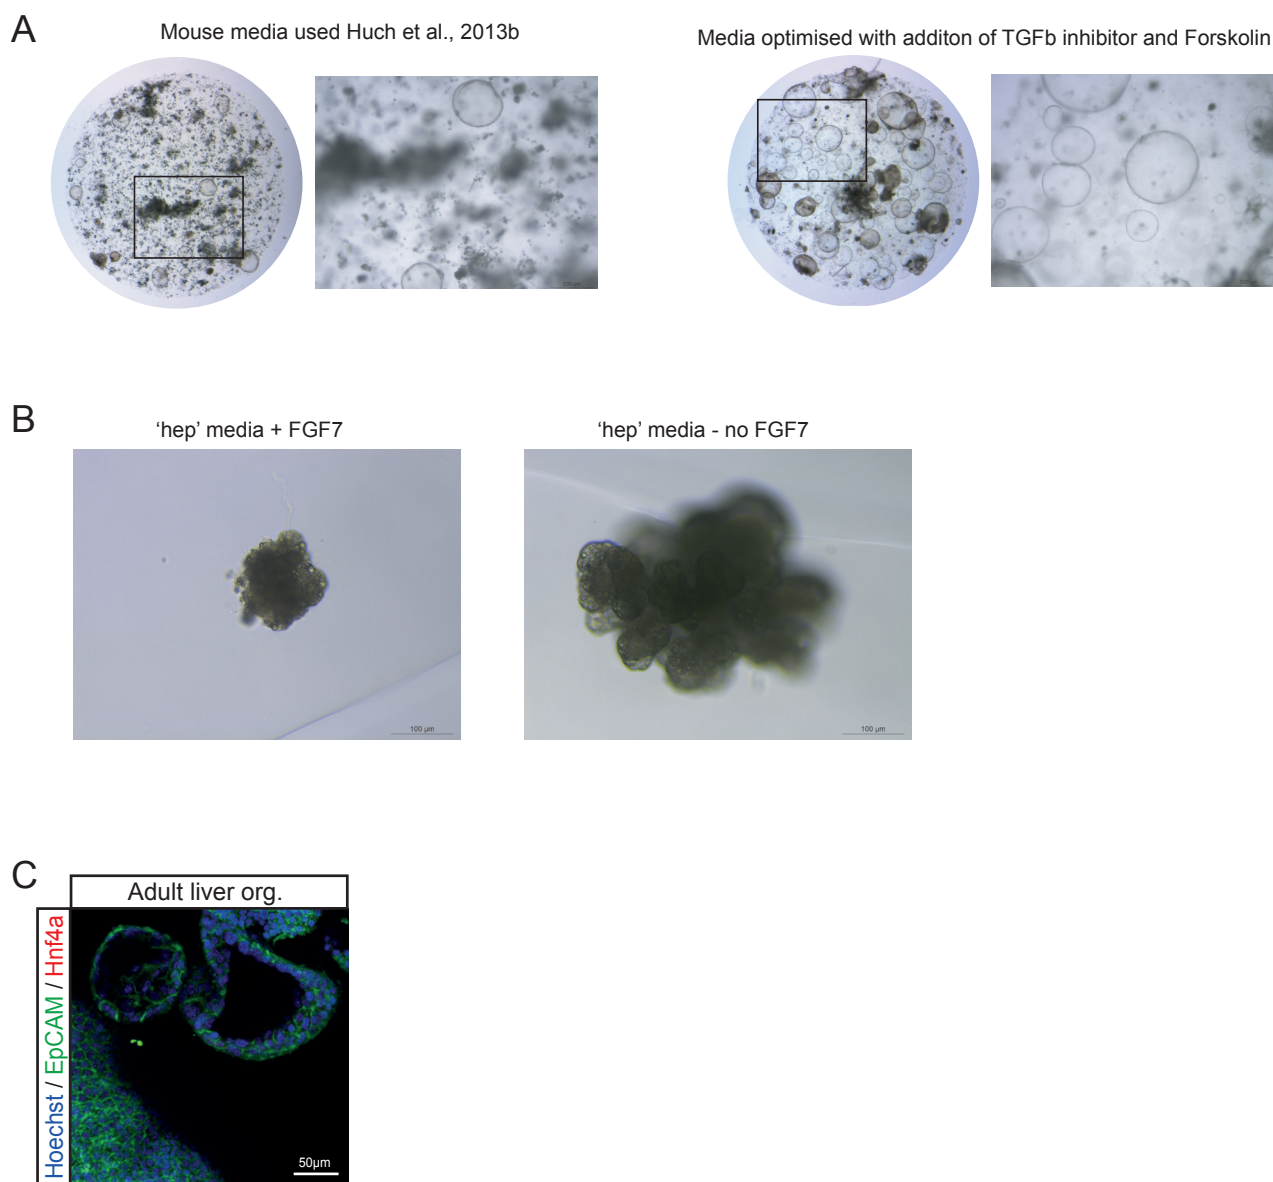

#### Supplementary Figure 4: Generation of mouse embryonic liver organoids

(A-B) Embryonic liver organoids were generated from bulk hepatoblasts obtained from E11.5 WT or *Lgr5-EGFP-IRES-creERT2* embryos dissociated as described in methods. (A) Isolated cells were embedded in Matrigel and cultured in our mouse liver organoid medium (Huch et al., Nature 2013) containing EGF, Noggin, Rspondin1, FGF10, HGF, Nicotinamide (left panel) or in the same medium supplemented with 1nM A8301 and 10uM Forskolin (optimized duct medium, right panel) as described in methods. This resulted in a evident increase in the number and size of organoids formed. (B) Isolated cells embedded in Matrigel were also cultured in the recently published hepatocyte (hep) medium that sustains human embryonic liver growth *in vitro* (ref Hu et al., 2018). Removal of FGF7 resulted in a significant improvement on the expansion of the organoids. For details refer to methods. (C) Immunofluorescence staining for the ductal marker EpCAM and the hepatocyte marker HNF4 in adult liver organoids cultured in our standard organoid medium as described in (Huch et al., Nature 2013). These served as positive control for the stainings shown in Figure 4.

## SUPPLEMENTARY Fig. 5

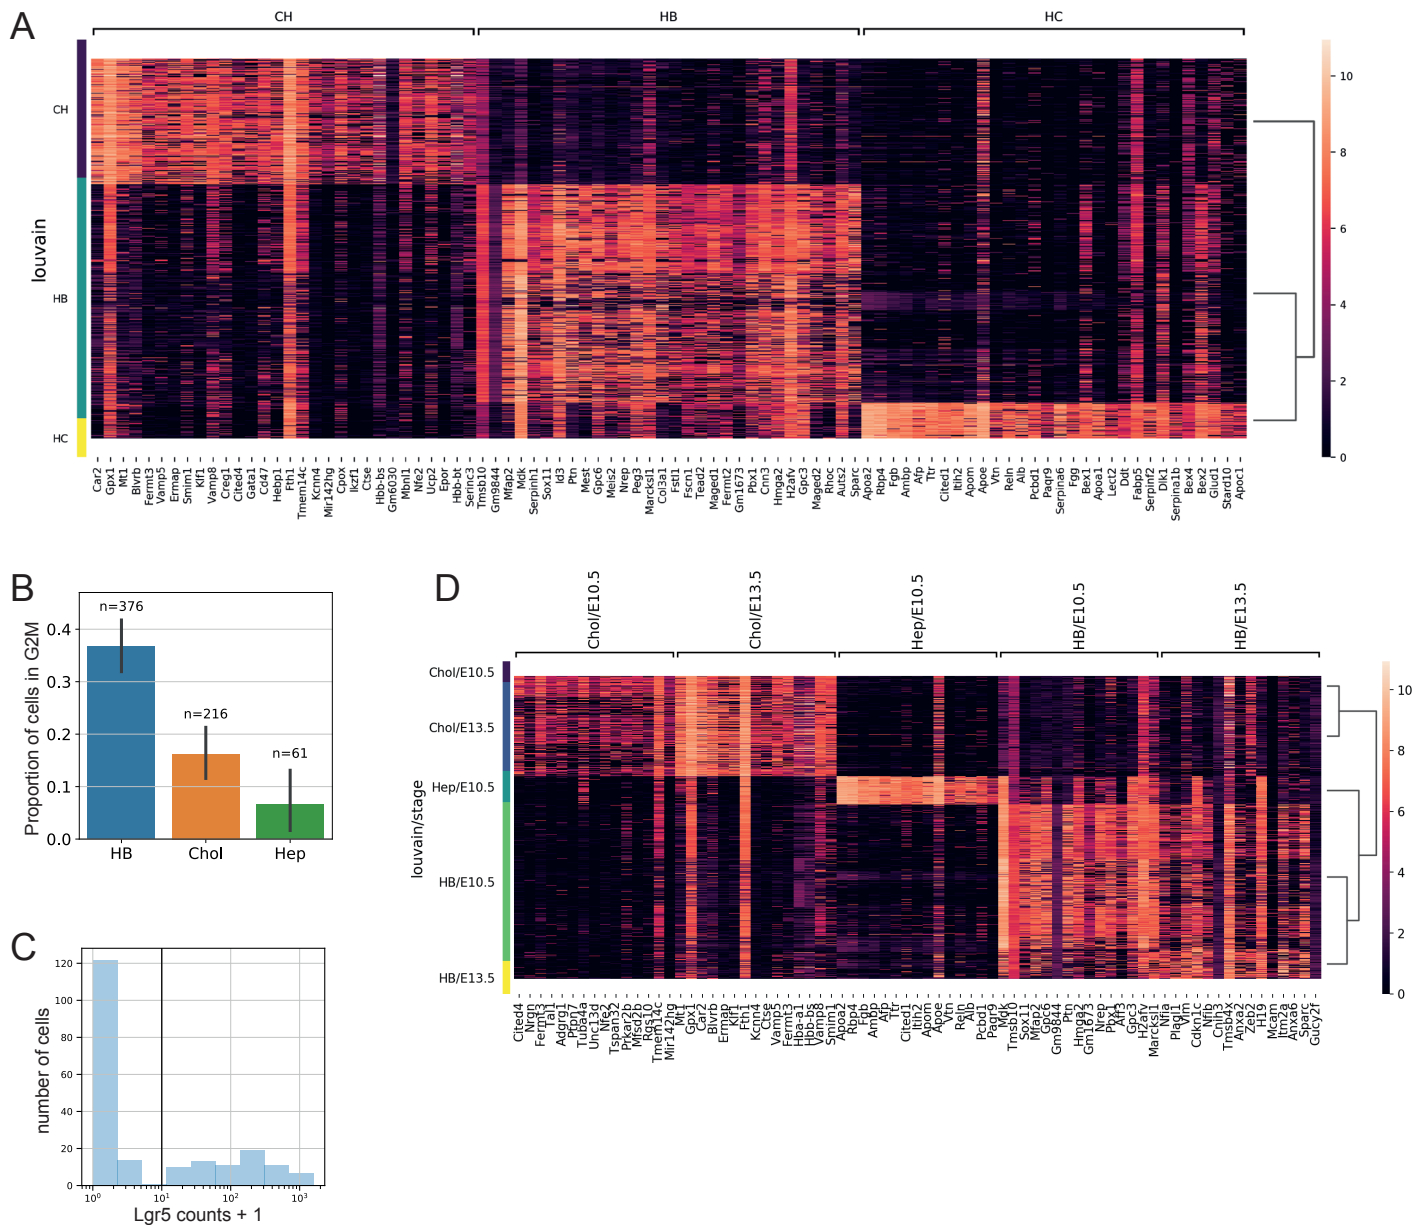

### Supplementary Figure 5: scRNAseq of hepatoblasts reveals heterogeneity in the hepatoblast population.

(A) Heatmap displaying the 30 most differentially expressed genes in each cluster as detailed in Supplementary Dataset 1. (B) Proportion of cells in G2M phase of the cell cycle in the hepatoblast cluster (HB), cholangiocyte-like cluster (Chol) and hepatocyte-like cluster (Hep) (mean $\pm$ 95% confidence intervals). (C) Histogram of the distribution of Lgr5 counts shows a bimodal distribution. A threshold of 10 counts is used to define a cell as Lgr5+ on the transcript level. Using this threshold, we find that 2% of the bulk cells at E10.5 are Lgr5+ at the transcript level.(D) Heatmap displaying the differentially expressed genes by time point. For extended list see Supplementary Dataset 1\_S2-S6.



## SUPPLEMENTARY Fig. 6

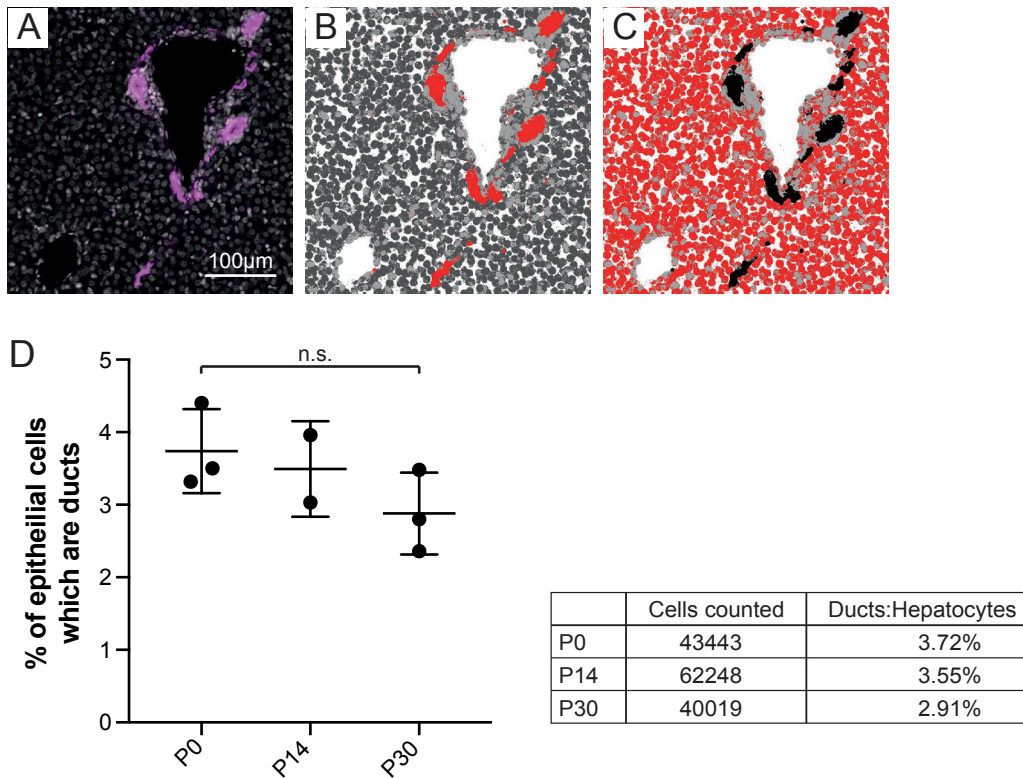

**Supplementary Figure 6: Counting of hepatocyte and ductal cell proportions in the homeostatic postnatal liver.** (A-D) To count the numbers of hepatocyte and ductal cell homeostatic proportions at the different postnatal time points of interest osteopontin (OPN) staining was performed to mark the ductal cells and then the proportion of hepatocytes vs ductal cells was counted using an automated system. (A) Osteopontin (OPN, purple) marks ductal cells in the P14 liver (nuclei are counter stained with Hoechst 33342). (B-C) Immunofluorescent images were segmented using ilastik-1.2.2 software in order to isolate cholangiocytes (B) and hepatocytes (C) (marked in red). (D) The segmented images were then imported into Fiji in order to count the number of cells using the find maxima function on the Hoechst channel. Automated counting reveals the homeostatic number of ductal cells as a percentage of epithelial cells is ~3% at all 3 time points (P0, P14 and P30) analysed. Graph represents the percentage of ductal cells within the total epithelial cells counted at the 3 time points analysed (mean  $\pm$  STDEV). On average a 3.4%  $\pm$  0.6% of epithelial cells of the mouse liver are ductal, this proportion does not change over postnatal days P0 - P30 (mean  $\pm$  STDEV). Table indicates the total number of cells counted and the % of ductal cells within these at each of the 3 time points analysed.

## SUPPLEMENTARY Fig. 7

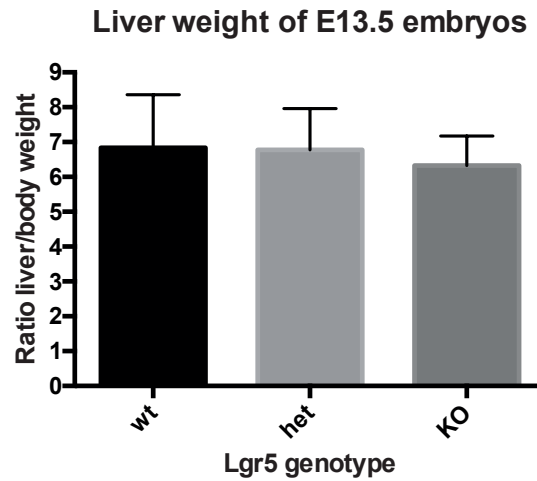

**Supplementary Figure 7: Lgr5\_KO does not exhibit an apparent liver phenotype.** Quantification of the ratio liver/body weight of the different genotypes for the Lgr5EGFP mouse model. Note that breeding this mouse as homozygous results in severe lethality at E17.5. Ratio liver/body weight of Lgr5EGFP WT, Het and KO mice (n=31, 5 different litters) at E13.5. No significant differences were found following analysis of all embryos or following sub-classification of genotypes according to sex (data not shown).
